# Supplementary material for: Activation of Cilia-Independent Hedgehog/GLI1 Signaling as a Novel Concept for Neuroblastoma Therapy
Source: MDPI journal article supplement (doi:10.3390/cancers13081908), 2021-04-15
Supplement: s1 [file s1]

**Koeniger et al.**

## **Supplemental figure legends**

### **Figure S1:**

**(A)** Correlation between *GLI1* and *MATN2* expression in NB tumors (SEQC cohort, 498 patients).

### **Figure S2:**

**(A)** Kaplan Meier curves depicting overall survival of NB patients in relationship to the *GLI1* expression (Kocak cohort [37], median split, logrank test).

**(B)** Kaplan Meier curves depicting overall survival of NB patients in relationship to the *MATN2* expression (Kocak cohort [37], median split, log rank test).

**(C)** Kaplan Meier curves depicting overall survival of NB patients in relationship to the *GLI2* expression (Kocak cohort [37], median split, log rank test).

**(D)** Kaplan Meier curves depicting overall survival of NB patients harboring *MYCN* amplifications in relationship to the *GLI1* expression (SEQC cohort, median split, log rank test).

**(E)** Kaplan Meier curves depicting overall survival of NB patients not harboring *MYCN* amplifications in relationship to the *GLI1* expression (SEQC cohort, median split, log rank test).

**(F)** Quantification of *GLI1* expression in transfected SH-SY5Y cells (qPCR). Related to Fig. 1F,G. Shown is the mean  $\pm$ SD of n=3-4 experiments.

**Figure S3:**

- (A)** Hh target gene expression (*GLI1*, *PTCH1*) in MCF7 cells treated with SAG (100 nM), Purmorphamine (PUR; 2  $\mu$ M), 25-Hydroxy-cholesterol (25-OHC; 5  $\mu$ M) or recombinant SHH (recSHH; 0.4  $\mu$ g/ml) for 48 h. Mean of n=3  $\pm$ SD.
- (B)** *Gli1* mRNA expression in NIH3T3 cells treated for 48 h with the indicated compounds to verify their effectiveness. SAG (100 nM), Purmorphamine (PUR; 2  $\mu$ M), 25-Hydroxy-cholesterol (25-OHC; 5  $\mu$ M), recombinant SHH (recSHH; 0.4  $\mu$ g/ml). Shown is one experiment.
- (C)** Chemical structure of ISX.
- (D)** Luminometric Hh activity assay (8xGLI-Luc) in transiently transfected NIH3T3 cells. Cells were treated with 20  $\mu$ M ISX for 24 h. Shown is the mean of n=3  $\pm$ SD. Significance by paired 2-tailed t-test.
- (E)** Quantification of GLI3<sup>R</sup>/GLI3<sup>FL</sup> protein levels in treated NIH3T3 cells. Shown is the mean  $\pm$ SD of n=2-4 experiments. ISX: 20  $\mu$ M; SAG: 100 nM. Treatment time: 48h.
- (F)** Quantification of cAMP concentration in NIH3T3 cells. Equal cell numbers were treated for 1h with the indicated compounds. ISX\_20/40 = 20/40  $\mu$ M ISX. Controls: FSK=Forskolin (Adenylate Cyclase activator, 50  $\mu$ M), SQ22536 (Adenylate Cyclase inhibitor, 100  $\mu$ M). Shown is one experiment of two measured in quadruplicate.

**Figure S4:**

- (A) Expression of the Hh target gene *Ptch1* in MEFs as measured by qPCR. Cells were treated with ISX (20  $\mu$ M), SANT1 (0.2  $\mu$ M) or SAG (100 nM) for 48 h. Shown is the mean of  $n \geq 3 \pm$ SD.
- (B) Expression of *Gli1* in MEFs as measured by qPCR. Cells were transfected with either control siRNA (siCon) or with a pool of four *Kif3a*-specific siRNAs (siKif3a) followed by treatment with DMSO, ISX (20  $\mu$ M), or SAG (100 nM) for 48h. Shown is the mean of  $n=3 \pm$ SD.
- (C) Measurement of *Kif3a*-knockdown efficiency in MEFs. Mean of  $n=3 \pm$ SD.

**Figure S5:**

- (A) Chemical structures of ISX-analogs.
- (B) Heatmap representation of the biological activities of ISX and its analogs (20  $\mu$ M, 48 h treatment time) as measured by *GLI2* induction in human PaTu8988T pancreatic cancer cells. The ISX-induced values were set to 100%. Shown is the mean of a duplicate measurement of one experiment of 2-4 independent experiments.

**Figure S6:**

- (A) HAT assay of nuclear extracts derived from MCF7 cells treated with DMSO, ISX (20  $\mu$ M) or SAHA (1  $\mu$ M) for 1 h. Shown is one experiment measured in quadruplicate (mean  $\pm$ SD).

**Figure S7:**

- (A) GLI1 immunoblot of *GLI1* wildtype (WT) and knockout (KO) SH-SY5Y cells. Shown is one experiment of two. ISX treatment (20  $\mu$ M) was for 48h.
- (B) Cell titer determination of *GLI1* WT/KO SHSY5Y cells exposed to the indicated concentrations of ISX for 4 d (5% FBS). Shown is one representative measurement in triplicate of  $n=2$  experiments.

A

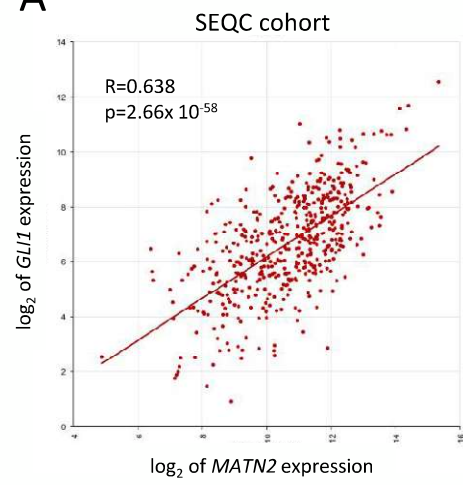



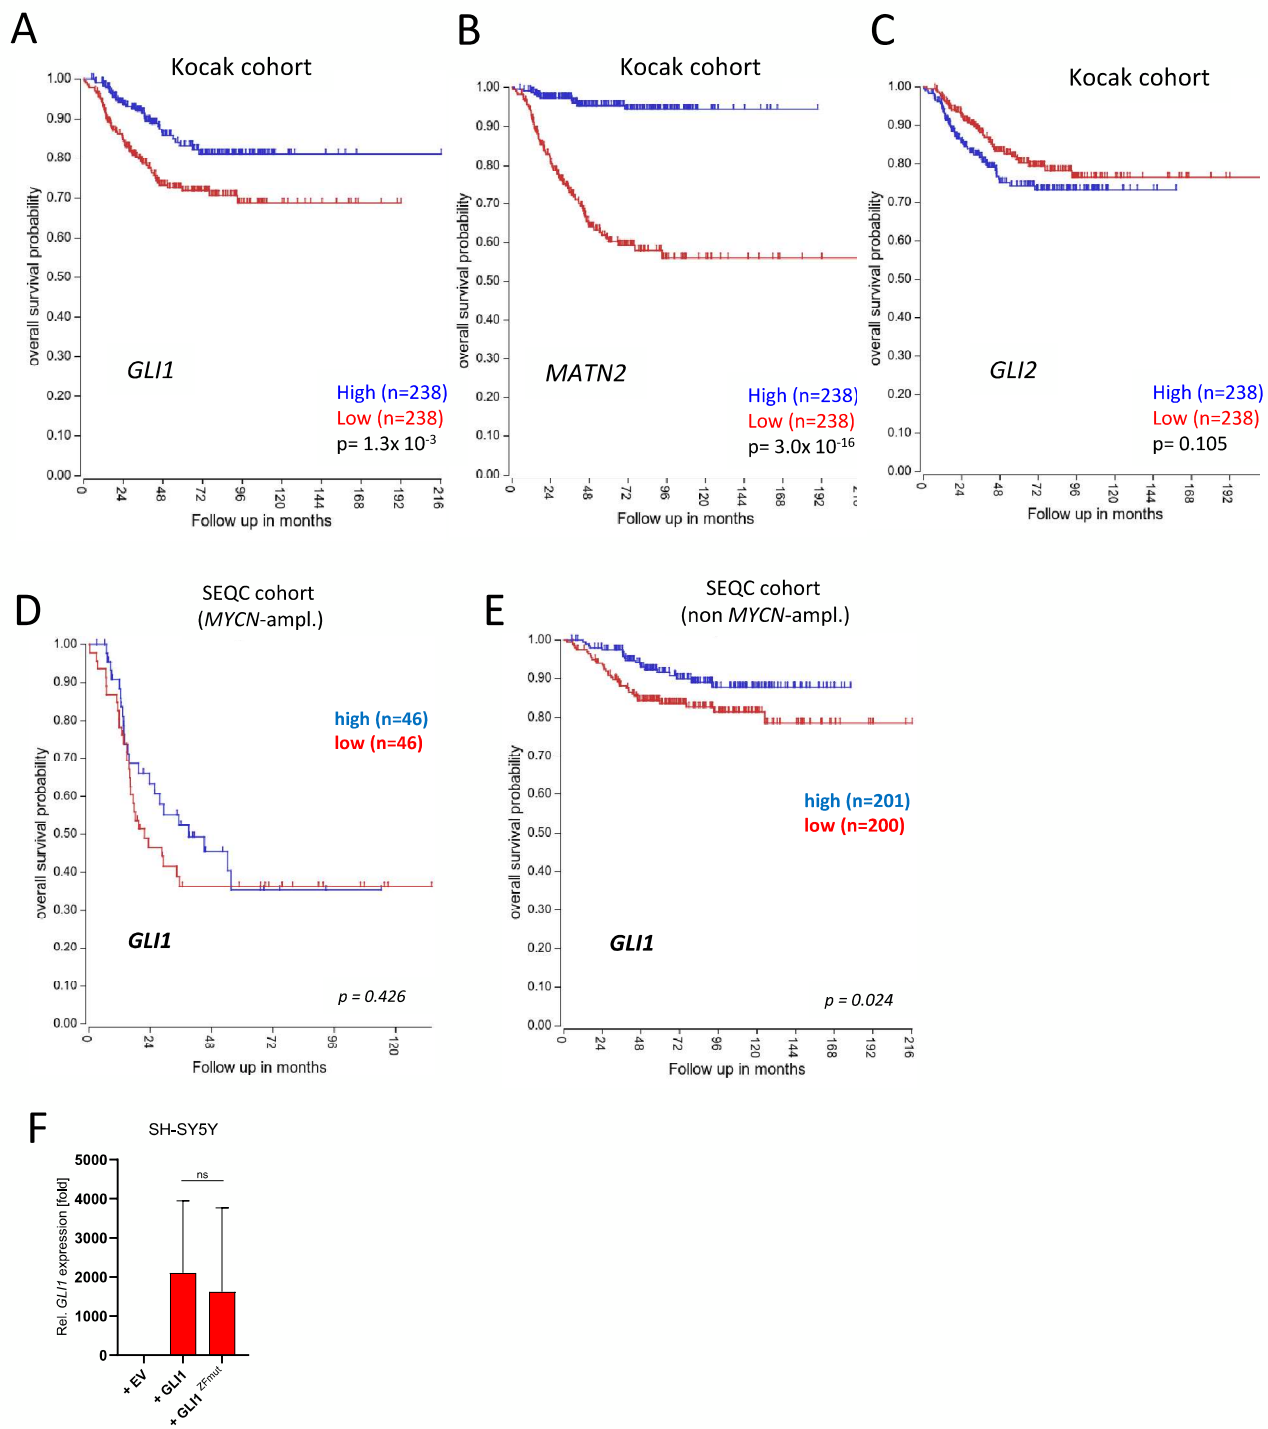

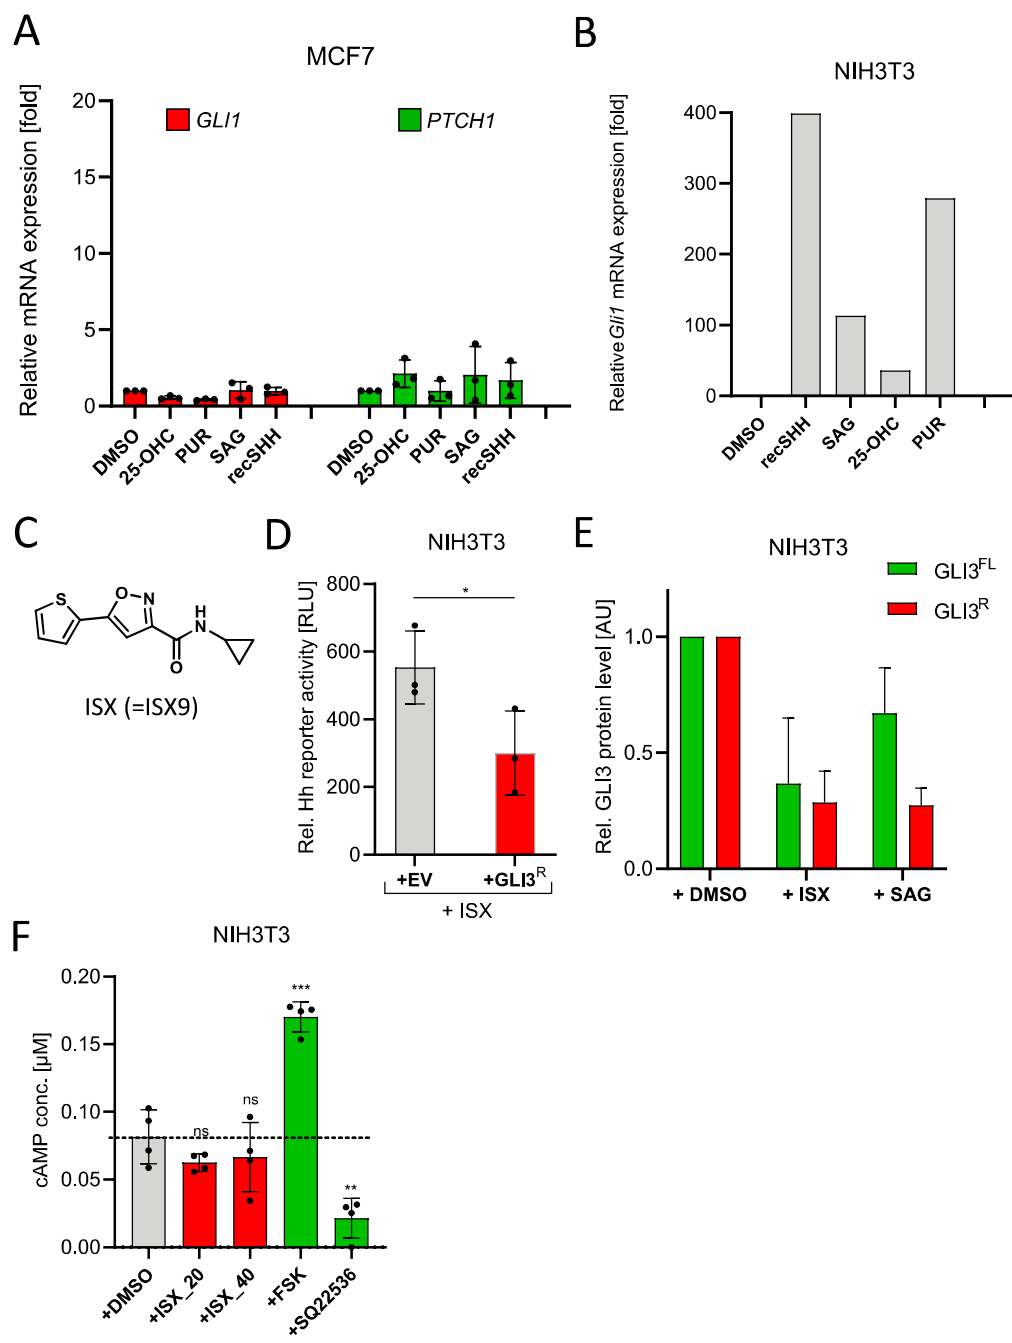

- Figure S3 -

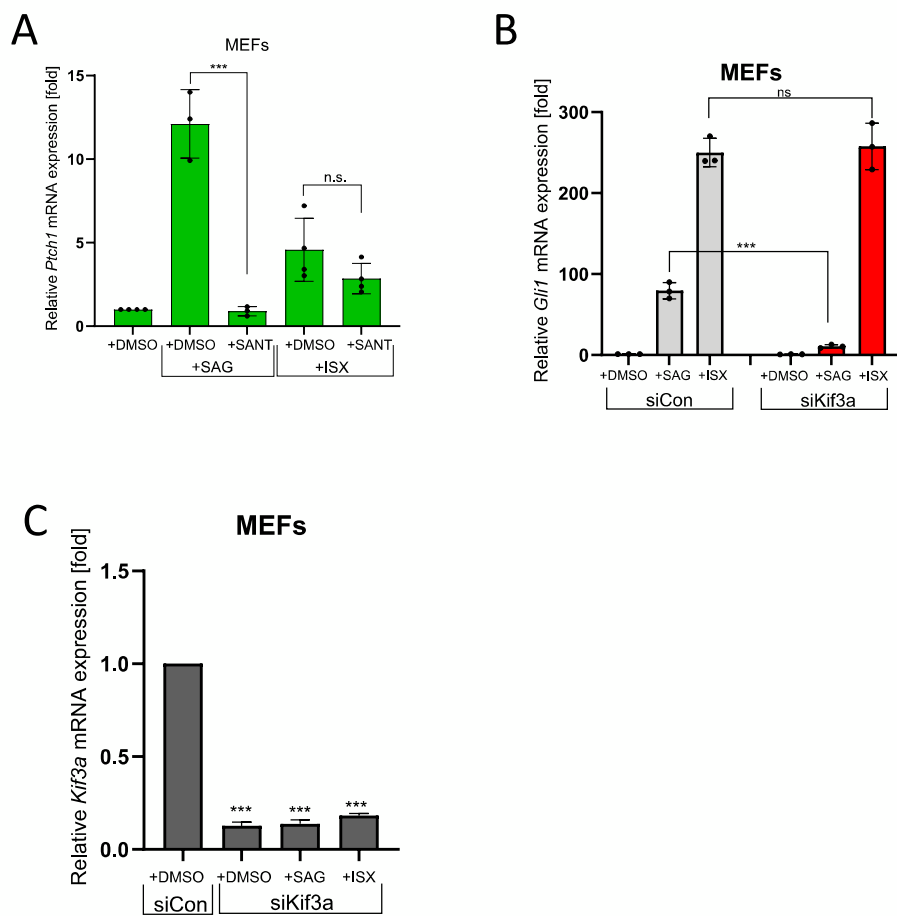

- Figure S4 -

A

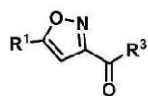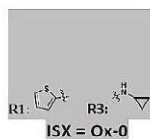

| name  | R <sup>1</sup> | R <sup>3</sup> | name  | R <sup>1</sup> | R <sup>3</sup> |
|-------|----------------|----------------|-------|----------------|----------------|
| Ox-1  | Me             |                | Ox-18 |                |                |
| Ox-2  |                |                | Ox-22 |                |                |
| Ox-3  |                | n-hexylamine   | Ox-25 |                |                |
| Ox-4  |                |                | Ox-26 |                |                |
| Ox-5  |                | OH             | Ox-27 |                |                |
| Ox-6  | Me             |                | Ox-29 |                |                |
| Ox-7  |                | OEt            | Ox-31 |                |                |
| Ox-8  | Me             | OEt            | Ox-32 |                |                |
| Ox-9  |                | OEt            | Ox-36 |                |                |
| Ox-10 |                |                | Ox-37 |                |                |
| Ox-11 |                |                | Ox-38 |                |                |
| Ox-14 |                |                | Ox-20 |                |                |
| Ox-15 |                |                | Ox-21 |                |                |
| Ox-16 |                |                | Ox-24 |                |                |
| Ox-17 |                |                | Ox-28 |                |                |

B

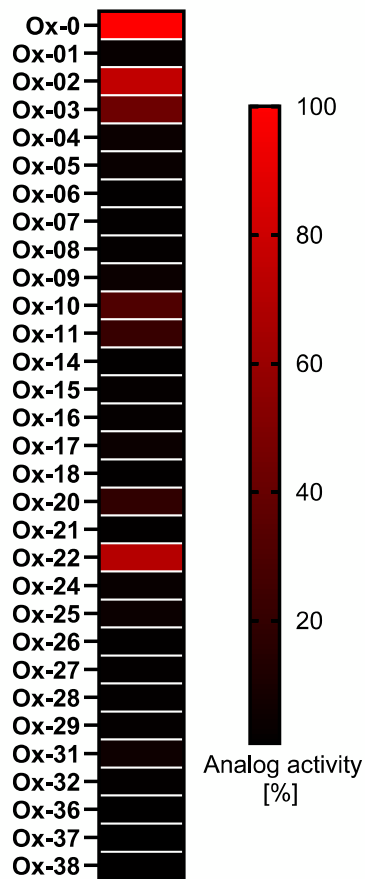

- Figure S5 -

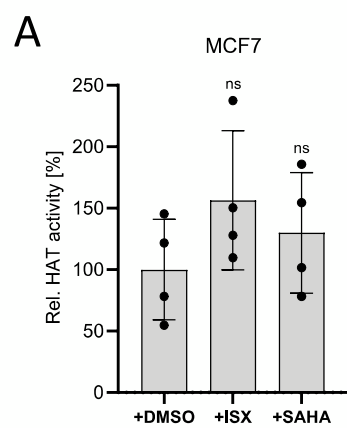

A

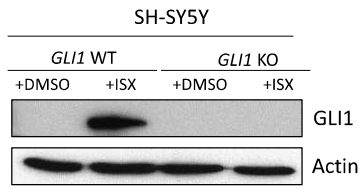

B

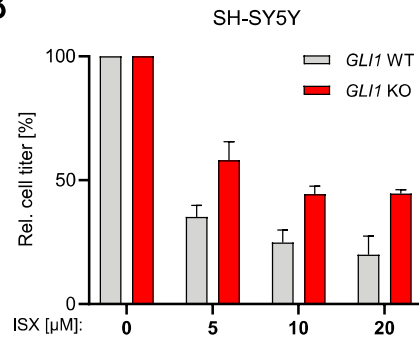

Koeniger et al.

## Supplemental material

### qPCR primer sequences:

| human                |                  |                             |
|----------------------|------------------|-----------------------------|
| Gene                 | sequence (5'→3') |                             |
| <b><i>GLI1</i></b>   | hGLI1_qFor       | TCTGGACATACCCACCTCCCTCTG    |
|                      | hGLI1_qRev       | ACTGCAGCTCCCCAATTTTCTGG     |
| <b><i>GLI2</i></b>   | hGLI2_qFor       | TGGCCGCTTCAGATGACAGATGTTG   |
|                      | hGLI2_qRev       | CGTTAGCCGAATGTCAGCCGTGAAG   |
| <b><i>GLI3</i></b>   | hGLI3_qFor       | TGGACCCCAAGGAATGGTTACATGGAG |
|                      | hGLI3_qRev       | TGCAATGGAGGAATCGGAGATGGAT   |
| <b><i>PTCH1</i></b>  | hPTCH1_qFor      | CCGCCTTCGCTCTGGAGCAGATT     |
|                      | hPTCH1_qRev      | TCTGAAACTTCGCTCTCAGCCACAGC  |
| <b><i>SMO</i></b>    | hSMO_qFor        | CACGGCAAGCTCGTGCTCTGGT      |
|                      | hSMO_qRev        | GCTCCACCCGGTCATTCTCACACTT   |
| <b><i>MATN2</i></b>  | hMATN2_qFor      | CGTGGCTACACTCTGGACCCAATG    |
|                      | hMATN2_qRev      | AGCCTTCTGAGCACTGGCAGACGAA   |
| <b><i>KAL1</i></b>   | hKAL1_qFor       | TACCGACTGGAAGTGCAAGTGCTGACC |
|                      | hKAL1_qRev       | GGCTTGTAATGATGTGGATGACGATGC |
| <b><i>VMAT2</i></b>  | hVMAT2_qFor      | GCCTTCTCCAGCAGCTATGCCTTCC   |
|                      | hVMAT2_qRev      | CGATTCCCATGACGTTGCCTCTCTC   |
| <b><i>CDKN2A</i></b> | hCDKN2A_qFor     | ATAGTTACGGTCGGAGGCCGATCCA   |
|                      | hCDKN2A_qRev     | GGCATCTATGCGGGCATGGTTACTG   |
| <b><i>CDKN2B</i></b> | hCDKN2B_qFor     | GCGCTTTTTCCCAGAAGCAATCCAG   |
|                      | hCDKN2B_qRev     | CATTACCCTCCCGTCGTCCTTCTGC   |
| <b><i>CCNA2</i></b>  | hCCNA2_qFor      | CAAAGCACCAAGCATGCACAACAG    |
|                      | hCCNA2_qRev      | CTGGTGGGTTGAGGAGAGAAACACCA  |
| <b><i>CCNB2</i></b>  | hCCNB2_qFor      | AGCACATGGCCAAGAATGTGGTGAA   |
|                      | hCCNB2_qRev      | GGAGGCAAGGTCTTTGACGGCTTTT   |
| <b><i>CCND1</i></b>  | hCCND1_qFor      | CACCTAGCAAGCTGCCGAACCAAAA   |
|                      | hCCND1_qRev      | TCACGACAGACAAAGCGTCCCTCAA   |
| <b><i>CCNE1</i></b>  | hCCNE1_qFor      | AGGGAGACGGGGAGCTCAAACTGA    |
|                      | hCCNE1_qRev      | CTTTGGTGGAGAAGGATGGGGTGGT   |
| <b><i>CCNE2</i></b>  | hCCNE2_qFor      | GGCATTATGACACCACCGAAGAGCA   |
|                      | hCCNE2_qRev      | TTGGCTAGGGCAATCAATCACAGCA   |
| <b><i>RPLP0</i></b>  | mGli1_qFor       | CCCATAGGGTCTCGGGGTCTCAAAT   |
|                      | mGli1_qRev       | GGAGGACCTGCGGCTGACTGTGTAA   |

**qPCR primer sequences:**

| mouse               |                  |                            |
|---------------------|------------------|----------------------------|
| Gene                | sequence (5'→3') |                            |
| <b><i>Gli1</i></b>  | mGli1_qFor       | CCCATAGGGTCTCGGGGTCTCAAAT  |
|                     | mGli1_qRev       | GGAGGACCTGCGGCTGACTGTGTAA  |
| <b><i>Gli2</i></b>  | mGli2_qFor       | TGAGGAGAGTGTGGAGGCCAGTAGCA |
|                     | mGli2_qRev       | CCGGGGCTGGACTGACAAAGC      |
| <b><i>Gli3</i></b>  | mGli3_qFor       | AAAGCGGGAAGAGTGCCTCCAGGT   |
|                     | mGli3_qRev       | TGGCTGCTGCATGAAGACTGACCAC  |
| <b><i>Ptch1</i></b> | mPtch1_qFor      | CGCCTTCGCTCTGGAGCAGATTTT   |
|                     | mPtch1_qRev      | TGAGGAGACCCACAACCAAACTTGC  |
| <b><i>Ptch2</i></b> | mPtch2_qFor      | CCCGTGGTAATCCTCGTGGCCTCTAT |
|                     | mPtch2_qRev      | TCCATCAGTCACAGGGGCAAAGGTC  |
| <b><i>Smo</i></b>   | mSmo_qFor        | GAGGAGCCATATTGCCCCAGGATGT  |
|                     | mSmo_qRev        | TCCGGCCCAAACGCTTCTCTAACTC  |
| <b><i>Sufu</i></b>  | mSufu_qFor       | GGAGCCCTCATCCCTCTCTGCCTAA  |
|                     | mSufu_qRev       | TACGGGTGTTCTCAGTGGCAAAGG   |
| <b><i>Kif3a</i></b> | mKif3a_qFor      | CAAGGGGAAAGCAAGGCCAAAGATG  |
|                     | mKif3a_qRev      | CTCTCCAGGCATGGGACAGCACTCT  |
| <b><i>Rplp0</i></b> | mP0_qFor         | TGCACTCTCGCTTTCTGGAGGGTGT  |
|                     | mP0_qRev         | AATGCAGATGGATCAGCCAGGAAGG  |

**siRNA sequences:**

siRNA sequences (targeting mouse genes)

| Name                             | Target sequence       |
|----------------------------------|-----------------------|
| siCon (Qiagen's All-Star; siAll) | AAUUCUCCGAACGUGUCACGU |
| siGli1_5                         | GAACUUCUGUGAUGGGCAA   |
| siGli1_6                         | GUCCUAUUCACGCCUUGAA   |
| siGli1_7                         | GGACUUUGUGGCUAUCCUA   |
| siKif3a_1                        | CCUGAGACCGUAAUUGAUU   |
| siKif3a_2                        | CGACUAAUAUGAACGAGCA   |
| siKif3a_3                        | AGACUUAUCAGCAUAUGUA   |
| siKif3a_4                        | CAUGAUGUGGCAAAUAUU    |



## Medicinal chemistry: Materials and methods

Compounds Ox-05, Ox-06, Ox-07, Ox-08, and Ox-09 are commercially available and were purchased from ABCR, Germany.

Compounds Ox-1, Ox-4, Ox-09, Ox-11, Ox-14, Ox-16, Ox-18, and Ox-28 have already been described elsewhere, however, full experimental details were not disclosed. [1]

General synthetic:

Unless stated otherwise, all commercially available starting materials and solvents were purchased and used without further purification. Microwave irradiation was applied with a Discover BenchMate Plus (CEM GmbH). Column chromatography was performed on prepacked flash chromatography columns (silica gel), thin-layer chromatography (TLC) on pre-coated TLC plates (silica gel 60 F254).  $^1\text{H}$  and  $^{13}\text{C}$  NMR spectra were recorded on a Jeol ECA-500 spectrometer. Chemical shifts ( $\delta$ ) are given in ppm with the residual solvent signal used as reference ( $\text{CDCl}_3$ : 7.26 / 77.16,  $\text{DMSO-d}_6$ : 2.50 / 39.52). Coupling constants (J) are reported in Hz. EI-mass spectra were recorded on an AccuTOF-GCv (JEOL) and ESI-mass spectra on an LTQ-FT (Finnigan). Elemental combustion analyses were performed on a Vario MICRO cube (Elementar Analysensysteme GmbH). Quantitative NMR (qNMR) measurements were recorded on a Jeol ECA-500 spectrometer using maleic acid, purchased from Sigma-Aldrich (99.94 % purity), as internal reference standard. Melting points were determined using a melting point meter M 5000 (Krüss) or an MPM-M2 (Schorpp) and are uncorrected.

**General procedure A** for the synthesis of Ox-01, Ox-02, Ox-03, Ox-04, Ox-10, Ox-11, Ox-14, Ox-15, Ox-16, utilizing the corresponding acid chlorides, which were prepared in situ as outlined in scheme 1.

The respective carboxylic acid (1.00 eq.) was suspended in DCM and DMF (1 drop), then excessive  $\text{SOCl}_2$  was added and the mixture heated to reflux for 3 h. Subsequently, cyclohexane (cHex) was added and the mixture concentrated *in vacuo*. The crude product was immediately submitted to the next reaction step without further purification.

The respective amine (1.10 eq.) and  $\text{Et}_3\text{N}$  (5 eq.) were dissolved in DCM at room temperature, followed by the drop-wise addition of the crude acid chloride (1.00 eq.) in DCM and stirring was continued overnight. Then the mixture was quenched with water, the organic phase washed with HCl (1 M, 3x), followed by a saturated aqueous solution of NaCl, dried over  $\text{MgSO}_4$ , and finally concentrated *in vacuo* to afford the respective product as colorless crystals.

Scheme 1:

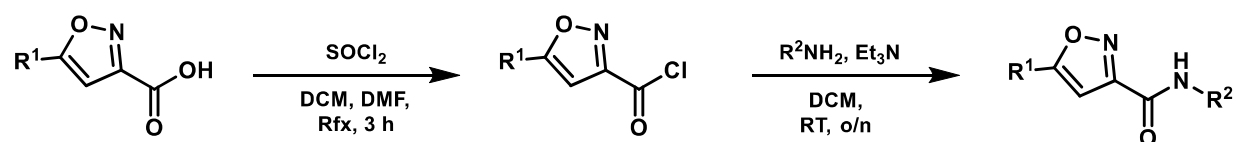

**General procedure B** for the synthesis of Ox-12, Ox-17, Ox-18, Ox-22, Ox-24, Ox-25, Ox-26, Ox-27, Ox-29, Ox-31, Ox-32, Ox-36, Ox-37, Ox-38 following the synthetic route depicted in Scheme 2.

Scheme 2:

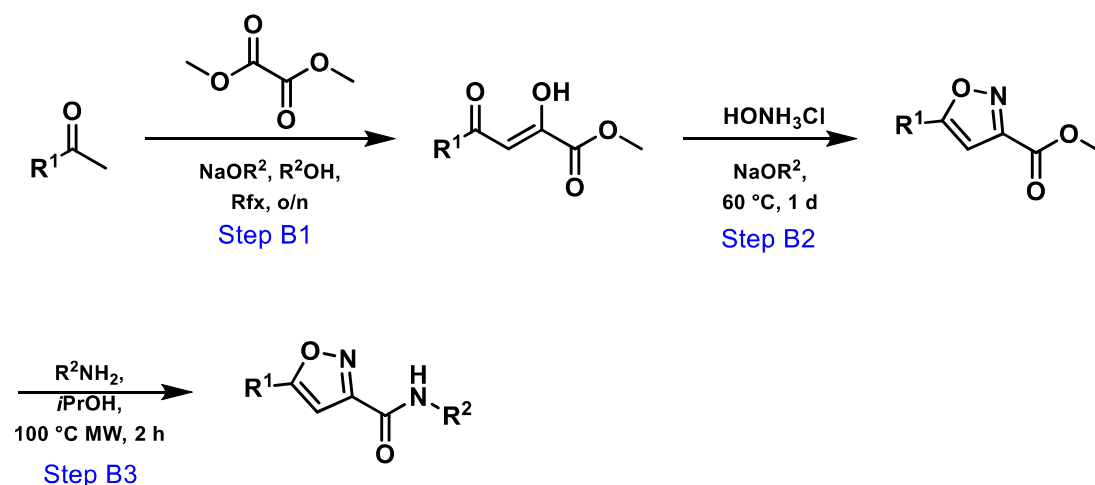

### Step B1: Synthesis of 2-hydroxy-4-oxo-but-2-enoates

#### method A:

To a freshly prepared 0.79 M solution of Na in MeOH (2.00 eq.), a solution of the respective ketone (1.00 eq.) and dimethyl oxalate (2.00 eq.) in MeOH (2.0 M based on ketone) was added and the reaction mixture was refluxed overnight. Then aqueous HCl was added and MeOH was removed *in vacuo*. Either, the resulting precipitate was separated by filtration and dried *in vacuo* (**A1**) or the aqueous phase extracted with DCM. The combined organic phase was washed with a saturated aqueous solution of NaCl, dried over MgSO<sub>4</sub> and concentrated *in vacuo* (**A2**). The crude product was immediately submitted to the next reaction step.

#### method B:

The respective ketone (1.00 eq.) and dimethyl oxalate (1.00 eq.) were dissolved in dry Et<sub>2</sub>O (1 M) and a freshly prepared solution of Na (1.20 eq., in MeOH (0.2 M)) was added slowly. The reaction mixture was stirred at rt overnight, the precipitate was separated by filtration, washed with cold MeOH, then with Et<sub>2</sub>O, and finally dried *in vacuo*.

The enolate was redissolved in H<sub>2</sub>O and stirred at rt for 1 h. Subsequently, the solution was acidified to pH 3 with conc. AcOH and the mixture stirred for 1 h at 0 °C. The resulting precipitate was filtered, washed with H<sub>2</sub>O and dried *in vacuo* to afford the product as an off-white solid, which was immediately

submitted to the next reaction step.

### Step B2: Synthesis of isoxazoles

To a solution of the respective crude 2-hydroxy-4-oxo-but-2-enoates (1.00 eq., e.g. from **step B1 method A or B**) in MeOH (0.3 M)  $\text{NH}_2\text{OH}^+\text{HCl}$  (1.18 eq.) was added and the resulting suspension stirred for 24 h at 60 °C. Subsequently, the reaction mixture was cooled to rt, concentrated *in vacuo*, redissolved in HCl (1 M) and then extracted with EtOAc. The combined organic phase was washed with a saturated aqueous solution of NaCl, dried over  $\text{MgSO}_4$  and concentrated *in vacuo*. Purification was carried out *via* column chromatography to afford the respective product as colorless crystals. [2]

### Step B3: Synthesis of isoxazole carboxamides from their corresponding methyl esters

The respective amine (2.00 eq.) and methyl ester (1.00 mmol, 1.00 eq., e.g. from **step B2**) were suspended in *i*-PrOH (1.0 M), submitted to a microwave device and stirred for 2 h at 100 °C (300 W). The precipitate was filtered, washed with *i*-PrOH and dried *in vacuo* to afford the respective product as colorless solid.

#### **N-Cyclopropyl-5-(thiophen-2-yl)isoxazol-3-carboxamide (Ox-0)**

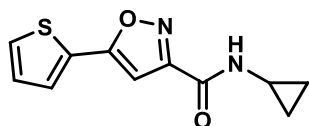

Following general procedure B, step B3 reaction of the respective methyl ester (2000 mg, 9.56 mmol) and cyclopropylamine (1.33 mL, 19.10 mmol, 2 eq.) rendered **Ox-12** (1300 mg, 5.55 mmol) in 58 % overall yield :  $^1\text{H-NMR}$  (500 MHz,  $\text{DMSO-d}_6$ ):  $\delta_{\text{H}}$  = 8.83 (d,  $^3J_{\text{H,H}}$  = 4.4 Hz, 1H), 7.86 (dd,  $^3J_{\text{H,H}}$  = 5.0 Hz,  $^4J_{\text{H,H}}$  = 1.1 Hz, 1H), 7.78 (dd,  $^3J_{\text{H,H}}$  = 3.7 Hz,  $^4J_{\text{H,H}}$  = 1.0 Hz, 1H), 7.26 (dd,  $^3J_{\text{H,H}}$  = 5.0 Hz, 3.7 Hz, 1H), 7.20 (s, 1H), 2.90 – 2.83 (m, 1H), 0.75 – 0.58 (m, 4H);  $^{13}\text{C-NMR}$  (125 MHz,  $\text{DMSO-d}_6$ ):  $\delta_{\text{C}}$  = 165.5, 159.5, 159.3, 130.0, 128.7, 128.6, 127.5, 99.0, 22.7, 5.6; HRMS (ESI,  $m/z$ ):  $[\text{M}+\text{Na}]^+$  calculated for  $[\text{C}_{11}\text{H}_{10}\text{N}_2\text{O}_2\text{NaS}]^+$ : 257.0355, found: 257.0356; combustion analysis (C/H/N, %): calculated for  $[\text{C}_{11}\text{H}_{10}\text{N}_2\text{O}_2\text{S}]$ : 56.40 / 4.30 / 11.96, found: 56.49 / 4.35 / 11.95; mp: 154 °C.

#### **N-Cyclopropyl-5-methylisoxazol-3-carboxamide (Ox-01)**

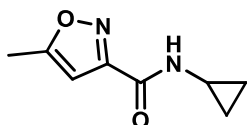

*N*-Cyclopropyl-5-methylisoxazol-3-carboxamide was prepared according to general procedure A employing cyclopropylamine (0.15 M solution, 7.33 mL, 1.10 eq.) and the corresponding acid chloride (145 mg, 1.00 mmol, 0.25 M, 1.00 eq.). The obtained product was further purified via column

chromatography (cHex / EtOAc, 2:1) yielding **Ox-01** (90 mg, 0.54 mmol) in 54 % overall yield:  $^1\text{H-NMR}$  (500 MHz, DMSO- $d_6$ ):  $\delta_H$  = 8.69 (d,  $^3J_{H,H}$  = 2.5 Hz, 1H), 6.50 (s, 1H), 2.88 – 2.78 (m, 1H), 2.44 (s, 3H), 0.73 – 0.55 (m, 4H);  $^{13}\text{C-NMR}$  (125 MHz, DMSO- $d_6$ ):  $\delta_C$  = 171.5, 160.4, 159.4, 101.7, 23.2, 12.3, 6.1; MS (ESI,  $m/z$ ):  $[\text{M}+\text{NH}_4]^+$  calculated for  $[\text{C}_8\text{H}_{14}\text{N}_3\text{O}_2]^+$ : 184.11, found: 184.16; combustion analysis (C/H/N, %): calculated for  $[\text{C}_8\text{H}_{10}\text{N}_2\text{O}_2]$ : 57.82 / 6.07 / 16.86, found: 58.20 / 6.09 / 16.99.

#### **N-Cyclopropyl-5-phenylisoxazol-3-carboxamide (Ox-02)**

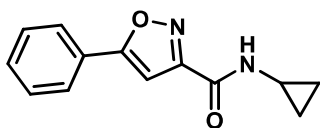

*N*-Cyclopropyl-5-phenylisoxazol-3-carboxamide was prepared according to general procedure A employing cyclopropylamine (0.15 M solution, 5.13 mL, 1.10 eq.) and the corresponding acid chloride (145 mg, 0.70 mmol, 0.18 M). Column chromatography (DCM / MeOH, 20:1) rendered **Ox-02** (90 mg, 0.39 mmol) in 56 % overall yield:  $^1\text{H-NMR}$  (500 MHz, DMSO- $d_6$ ):  $\delta_H$  = 8.68 (d,  $^3J_{H,H}$  = 7.3 Hz, 1H), 7.95 – 7.89 (m, 2H), 7.60 – 7.48 (m, 3H), 7.33 (s, 1H), 4.29 – 4.17 (m, 1H), 1.97 – 1.45 (m, 4H);  $^{13}\text{C-NMR}$  (125 MHz, DMSO- $d_6$ ):  $\delta_C$  = 170.1, 159.9, 158.2, 130.8, 129.4, 126.4, 125.8, 99.9, 22.8, 5.7; MS (ESI,  $m/z$ ):  $[\text{M}+\text{NH}_4]^+$  calculated for  $[\text{C}_{13}\text{H}_{16}\text{N}_3\text{O}_2]^+$ : 246.12, found: 246.22; combustion analysis (C/H/N, %): calculated for  $[\text{C}_{13}\text{H}_{12}\text{N}_2\text{O}_2]$ : 68.41 / 5.30 / 12.27, found: 68.19 / 5.36 / 12.40; mp: 139 °C.

#### **N-Hexyl-5-(thiophen-2-yl)isoxazol-3-carboxamide (Ox-03)**

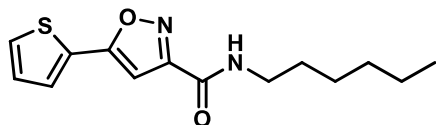

*N*-Hexyl-5-(thiophen-2-yl)isoxazol-3-carboxamide was prepared according to general procedure A employing *n*-hexylamine (0.17 M solution, 4.85 mL, 1.10 eq.) and the corresponding acid chloride (160 mg, 0.75 mmol, 0.15 M). Column chromatography (cHex / EtOAc, 6:1) gave rise to **Ox-03** (197 mg, 0.71 mmol) in 94 % overall yield:  $^1\text{H-NMR}$  (500 MHz,  $\text{CDCl}_3$ ):  $\delta_H$  = 8.75 (t,  $^3J_{H,H}$  = 5.6 Hz, 1H), 7.86 (d,  $^3J_{H,H}$  = 5.0 Hz, 1H), 7.78 (d,  $^3J_{H,H}$  = 3.7 Hz, 1H), 7.26 (dd,  $^3J_{H,H}$  = 4.7 Hz, 4.0 Hz, 1H), 7.16 (s, 1H), 3.24 (q,  $^3J_{H,H}$  = 6.7 Hz, 2H), 1.62 – 1.44 (m, 2H), 1.37 – 1.19 (m, 6H), 0.97 – 0.79 (m, 3H);  $^{13}\text{C-NMR}$  (125 MHz,  $\text{CDCl}_3$ ):  $\delta_C$  = 166.6, 159.4, 158.7, 128.8, 128.6, 128.3, 127.8, 99.0, 39.7, 31.6, 29.5, 26.7, 22.7, 14.2; MS (ESI,  $m/z$ ):  $[\text{M}+\text{NH}_4]^+$  calculated for  $[\text{C}_{14}\text{H}_{22}\text{N}_3\text{O}_2\text{S}]^+$ : 296.14, found: 296.25; combustion analysis (C/H/N, %): calculated for  $[\text{C}_{14}\text{H}_{18}\text{N}_2\text{O}_2\text{S}] \cdot 0.25 \text{ H}_2\text{O}$ : 59.44 / 6.59 / 9.90, found: 59.27 / 6.41 / 9.85; mp: 92 °C.

#### **N-Benzyl-5-(thiophen-2-yl)isoxazole-3-carboxamide (Ox-04)**

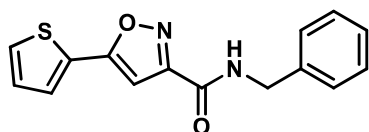

*N*-Benzyl-5-(thiophen-2-yl)isoxazole-3-carboxamide was prepared according to general procedure A employing the corresponding acid chloride (160 mg, 0.75 mmol, 0.13 M) and benzylamine (0.18 M, 4.58 mL, 1.10 eq.). Column chromatography (cHex / EtOAc, 4:1) rendered **Ox-04** (70 mg, 0.25 mmol) in 94 % overall yield:  $^1\text{H-NMR}$  (500 MHz, DMSO- $d_6$ ):  $\delta_H$  = 9.35 (t,  $^3J_{H,H}$  = 6.1 Hz, 1H), 7.87 (dd,  $^3J_{H,H}$  = 5.0 Hz,  $^4J_{H,H}$  = 1.1 Hz, 1H), 7.79 (dd,  $^3J_{H,H}$  = 3.6 Hz,  $^4J_{H,H}$  = 1.1 Hz, 1H), 7.38 – 7.34 (m, 4H), 7.30 – 7.23 (m, 2H), 7.20 (s, 1H), 4.47 (d,  $^3J_{H,H}$  = 6.2 Hz, 2H);  $^{13}\text{C-NMR}$  (125 MHz, DMSO- $d_6$ ):  $\delta_C$  = 166.3, 160.1, 158.8, 139.4, 130.7, 129.30, 129.28, 128.9, 128.1, 127.9, 127.5, 99.7, 42.9; MS (ESI,  $m/z$ ):  $[\text{M}+\text{NH}_4]^+$  calculated for  $[\text{C}_{15}\text{H}_{16}\text{N}_3\text{O}_2\text{S}]^+$ : 302.10, found: 302.19; combustion analysis (C/H/N, %): calculated for  $[\text{C}_{15}\text{H}_{12}\text{N}_2\text{O}_2\text{S}]$  \* 0.5  $\text{H}_2\text{O}$ : 61.42 / 4.47 / 9.55, found: 61.56 / 4.24 / 9.52; mp: 135 °C.

#### ***N*-Cyclopentyl-5-phenylisoxazol-3-carboxamide (Ox-10)**

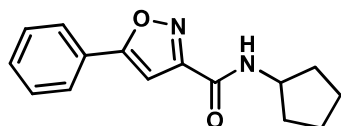

In accordance with general procedure A, *N*-cyclopentyl-5-phenylisoxazol-3-carboxamide was prepared utilizing the respective acid chloride (270 mg, 1.30 mmol, 0.16 M) and cyclopentylamine (0.20 M, 7.15 mL, 1.10 eq.). Purification via column chromatography (cHex / EtOAc, 9:1) gave rise to **Ox-10** (237 mg, 0.92 mmol) in 71 % overall yield:  $^1\text{H-NMR}$  (500 MHz, DMSO- $d_6$ ):  $\delta_H$  = 8.68 (d,  $^3J_{H,H}$  = 7.3 Hz, 1H), 7.95 – 7.89 (m, 2H), 7.60 – 7.48 (m, 3H), 7.33 (s, 1H), 4.23 (sm, 1H), 1.97 – 1.45 (m, 8H);  $^{13}\text{C-NMR}$  (125 MHz, DMSO- $d_6$ ):  $\delta_C$  = 170.1, 159.9, 158.2, 130.8, 129.4, 126.4, 125.8, 99.9, 50.7, 31.9, 23.6; HRMS (ESI,  $m/z$ ):  $[\text{M}+\text{Na}]^+$  calculated for  $[\text{C}_{15}\text{H}_{16}\text{N}_2\text{O}_2\text{Na}]^+$ : 279.1104, found: 279.1106; combustion analysis (C/H/N, %): calculated for  $[\text{C}_{15}\text{H}_{16}\text{N}_2\text{O}_2]$ : 70.29 / 6.29 / 10.93, found: 70.20 / 6.30 / 10.89; mp: 139 °C.

#### ***N*-Cyclopentyl-5-(thiophen-2-yl)isoxazol-3-carboxamide (Ox-11)**

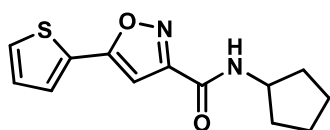

According to general procedure A, utilization of the respective acid chloride (147 mg, 0.69 mmol, 1.00 eq.), cyclopentylamine (0.08 mL, 1.20 mmol, 1.75 eq.), and  $\text{Et}_3\text{N}$  (2.48 eq.) gave rise to **Ox-11** (131 mg, 0.50 mmol) in 73 % overall yield after column chromatography (cHex / EtOAc, 9:1):  $^1\text{H-NMR}$  (500 MHz, DMSO- $d_6$ ):  $\delta_H$  = 8.68 (d,  $^3J_{H,H}$  = 7.6 Hz, 1H), 7.86 (dd,  $^3J_{H,H}$  = 5.0 Hz,  $^4J_{H,H}$  = 1.1 Hz, 1H), 7.77 (dd,  $^3J_{H,H}$  = 3.7

Hz,  $^4J_{H,H} = 1.1$  Hz, 1H), 7.26 (dd,  $^3J_{H,H} = 5.0$  Hz, 3.7 Hz, 1H), 7.16 (s, 1H), 4.28 – 4.15 (m, 1H), 1.96 – 1.44 (m, 8H);  $^{13}\text{C}$ -NMR (125 MHz, DMSO- $d_6$ ):  $\delta_c = 165.4, 159.7, 157.8, 129.9, 128.7, 128.5, 127.6, 99.1, 50.7, 31.8, 23.5$ ; HRMS (ESI,  $m/z$ ):  $[\text{M}+\text{Na}]^+$  calculated for  $[\text{C}_{13}\text{H}_{14}\text{N}_2\text{O}_2\text{NaS}]^+$ : 285.0668, found: 285.0670; combustion analysis (C/H/N, %): calculated for  $[\text{C}_{13}\text{H}_{14}\text{N}_2\text{O}_2\text{S}]$ : 59.52 / 5.38 / 10.68, found: 59.33 / 5.39 / 10.61; mp: 148 °C.

#### **Morpholino(5-(thiophen-2-yl)isoxazol-3-yl)methanon (Ox-14)**

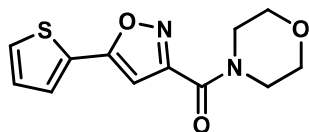

Utilization of the respective acid chloride (217 mg, 1.02 mmol, 0.10 M) and morpholine (0.06 M, 18.7 mL, 1.1 eq. ) according to general procedure A followed by column chromatography (cHex / EtOAc, 6:1) and re-crystallization (cHex) gave rise to **Ox-14** (60 mg, 0.23 mmol) in 22 % overall yield:  $^1\text{H}$ -NMR (500 MHz, DMSO- $d_6$ ):  $\delta_H = 7.87$  (dd,  $^3J_{H,H} = 4.9$  Hz,  $^4J_{H,H} = 1.2$  Hz, 1H), 7.78 (dd,  $^3J_{H,H} = 3.7$  Hz,  $^4J_{H,H} = 1.2$  Hz, 1H), 7.27 (dd,  $^3J_{H,H} = 5.0$  Hz, 3.6 Hz, 1H), 7.11 (s, 1H), 3.69 – 3.58 (m, 8H);  $^{13}\text{C}$ -NMR (125 MHz, DMSO- $d_6$ ):  $\delta_c = 164.9, 158.81, 158.78, 130.1, 128.7, 127.4, 100.0, 66.3, 65.8, 47.0, 42.2$ ; HRMS (ESI,  $m/z$ ):  $[\text{M}+\text{Na}]^+$  calculated for  $[\text{C}_{12}\text{H}_{12}\text{N}_2\text{O}_3\text{NaS}]^+$ : 287.0461, found: 287.0459; combustion analysis (C/H/N, %): calculated for  $[\text{C}_{12}\text{H}_{12}\text{N}_2\text{O}_3\text{S}]$ : 54.53 / 4.58 / 10.60, found: 54.51 / 4.65 / 10.61; mp: 127 °C.

#### **N-Isopropyl-5-(thiophen-2-yl)isoxazole-3-carboxamide (OX-15)**

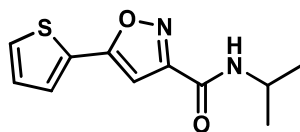

In accordance to general procedure A, **Ox-15** was obtained employing the respective acid chloride (213 mg, 1.00 mmol, 1.0 eq) and *i*-propylamine (2.07 mmol, 0.17 mL, 2.07 eq.). Column chromatography (cHex / EtOAc, 6:1) rendered **Ox-15** (139 mg, 0.59 mmol) in 59 % yield over two steps:  $^1\text{H}$ -NMR (500 MHz, DMSO- $d_6$ ):  $\delta_H = 8.58$  (d,  $^3J_{H,H} = 8.0$  Hz, 1H), 7.86 (dd,  $^3J_{H,H} = 4.9$  Hz,  $^4J_{H,H} = 1.2$  Hz, 1H), 7.78 (dd,  $^3J_{H,H} = 3.6$  Hz,  $^4J_{H,H} = 1.3$  Hz, 1H), 7.26 (dd,  $^3J_{H,H} = 4.9$  Hz, 3.7 Hz, 1H), 7.16 (s, 1H), 4.10 (sm, 1H), 1.17 (d,  $^3J_{H,H} = 6.6$  Hz, 6H);  $^{13}\text{C}$ -NMR (125 MHz, DMSO- $d_6$ ):  $\delta_c = 165.4, 159.8, 157.3, 129.9, 128.7, 128.5, 127.6, 99.1, 99.0, 41.0, 21.9$ ; HRMS (ESI,  $m/z$ ):  $[\text{M}+\text{Na}]^+$  calculated for  $[\text{C}_{11}\text{H}_{12}\text{N}_2\text{O}_2\text{NaS}]^+$ : 259.0512, found: 259.0509; combustion analysis (C/H/N, %): calculated for  $[\text{C}_{11}\text{H}_{12}\text{N}_2\text{O}_2\text{S}]$ : 55.92 / 5.12 / 11.86, found: 55.88 / 5.13 / 11.88; mp: 112 °C.

#### ***N*-(*tert*-Butyl)-5-(thiophen-2-yl)isoxazol-3-carboxamide (Ox 16)**

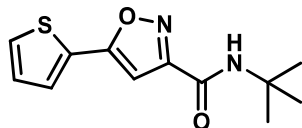

In accordance with general procedure A, *N*-(*tert*-butyl)-5-(thiophen-2-yl)isoxazol-3-carboxamide was prepared utilizing the respective acid chloride (162 mg, 0.76 mmol, 0.10 M) and *tert*.-butylamine (0.17 M, 4.92 mL, 1.10 eq.). Purification via column chromatography (cHex / EtOAc, 6:1) gave rise to **Ox-16** (51 mg, 0.20 mmol) in 27 % overall yield:  $^1\text{H-NMR}$  (500 MHz, DMSO- $d_6$ ):  $\delta_H$  = 7.99 (br s, 1H), 7.85 (dd,  $^3J_{H,H}$  = 5.2 Hz,  $^4J_{H,H}$  = 1.2 Hz, 1H), 7.76 (dd,  $^3J_{H,H}$  = 3.6 Hz,  $^4J_{H,H}$  = 1.3 Hz, 1H), 7.26 (dd,  $^3J_{H,H}$  = 5.2 Hz, 3.7 Hz, 1H), 7.13 (s, 1H), 1.38 (s, 9H);  $^{13}\text{C-NMR}$  (125 MHz, DMSO- $d_6$ ):  $\delta_C$  = 165.3, 160.3, 157.9, 129.9, 128.7, 128.5, 127.6, 99.0, 51.3, 28.3; HRMS (ESI,  $m/z$ ):  $[\text{M}+\text{Na}]^+$  calculated for  $[\text{C}_{12}\text{H}_{14}\text{N}_2\text{O}_2\text{NaS}]^+$ : 273.0668, found: 273.0666; combustion analysis (C/H/N, %): calculated for  $[\text{C}_{12}\text{H}_{14}\text{N}_2\text{O}_2\text{S}]$ : 57.58 / 5.64 / 11.19, found: 57.59 / 5.64 / 11.21; mp: 119 °C.

#### **Methyl 5-(thiophen-2-yl)isoxazole-3-carboxylate**

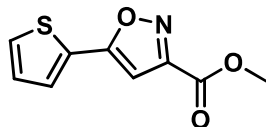

Following general procedure B 1, reaction of 1-(thiophen-2-yl)ethan-1-on (4.28 mL, 39.63 mmol) provided intermediate methyl-(*Z*)-2-hydroxy-4-oxo-4-(thiophen-2-yl)but-2-enoate, 6450 mg (30.39 mmol) of which were reacted with  $\text{NH}_2\text{OH}^+\text{HCl}$  (1.18 eq.) in the following step (B2) giving rise to methyl-5-(thiophen-2-yl)isoxazol-3-carboxylate (4990 mg, 23.85 mmol) after column chromatography (DCM/MeOH, 20:1) in 60 % overall yield:  $^1\text{H-NMR}$  (500 MHz, DMSO- $d_6$ ):  $\delta_H$  = 7.89 (dd,  $^3J_{H,H}$  = 5.0 Hz,  $^4J_{H,H}$  = 1.3 Hz, 1H), 7.83 (dd,  $^3J_{H,H}$  = 3.7 Hz,  $^4J_{H,H}$  = 1.2 Hz, 1H), 7.32 (s, 1H), 7.28 (dd,  $^3J_{H,H}$  = 5.2 Hz, 3.7 Hz, 1H), 3.92 (s, 3H);  $^{13}\text{C-NMR}$  (125 MHz, DMSO- $d_6$ ):  $\delta_C$  = 166.4, 159.6, 156.6, 130.4, 129.0, 128.7, 127.2, 99.9, 52.8; HRMS (ESI,  $m/z$ ):  $[\text{M}+\text{H}]^+$  calculated for  $[\text{C}_9\text{H}_8\text{NO}_3\text{S}]^+$ : 210.0219, found: 210.0222; combustion analysis (C/H/N/S, %): calculated for  $[\text{C}_9\text{H}_7\text{NO}_3\text{S}]$ : 51.67 / 3.37 / 6.69 / 15.32, found: 51.59 / 3.39 / 6.66 / 15.27.

#### ***N*-(Cyclohexylmethyl)-5-(thiophen-2-yl)isoxazol-3-carboxamide (Ox-17)**

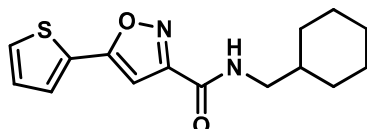

According to general procedure B, step B3, utilization of the respective methyl ester (209 mg, 1.0 mmol, 1.00 eq.) and cyclohexylmethanamine (0.26 mL, 2.00 mmol, 2.00 eq.) gave rise to **Ox-17** (188 mg, 0.75 mmol) as colorless crystals in 75 % overall yield:  $^1\text{H-NMR}$  (500 MHz, DMSO- $d_6$ ):  $\delta_H$  = 8.56 (t,  $^3J_{H,H}$  = 5.9 Hz, 1H), 7.86 (dd,  $^3J_{H,H}$  = 4.9 Hz,  $^4J_{H,H}$  = 1.2 Hz, 1H), 7.78 (dd,  $^3J_{H,H}$  = 3.7 Hz,  $^4J_{H,H}$  = 1.2 Hz, 1H), 7.26 (dd,  $^3J_{H,H}$  = 4.9 Hz, 3.7 Hz, 1H), 7.16 (s, 1H), 3.10 (dd,  $^3J_{H,H}$  = 6.6 Hz, 6.6 Hz, 2H), 1.76 – 0.84 (m, 11H);  $^{13}\text{C-NMR}$  (125 MHz, DMSO- $d_6$ ):  $\delta_C$  = 165.5, 159.7, 158.2, 129.9, 128.6, 128.5, 127.6, 99.0, 45.0, 37.2, 30.3, 26.0, 25.3; HRMS (ESI,  $m/z$ ):  $[\text{M}+\text{Na}]^+$  calculated for  $[\text{C}_{15}\text{H}_{18}\text{N}_2\text{O}_2\text{NaS}]^+$ : 313.0981, found: 313.0983; combustion analysis (C/H/N, %): calculated for  $[\text{C}_{15}\text{H}_{18}\text{N}_2\text{O}_2\text{S}]$ : 62.04 / 6.25 / 9.65, found: 62.11 / 6.50 / 9.50; mp: 156 °C.

#### **N-Cyclohexyl-5-(thiophen-2-yl)isoxazol-3-carboxamide (Ox-18)**

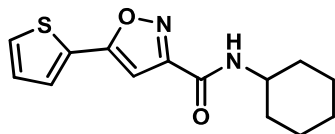

Following general procedure B step B3, utilization of the respective methyl ester (209 mg, 1.00 mmol, 1.00 eq.) and cyclohexylamine (0.23 mL, 2.0 mmol, 2.00 eq.) furnished **Ox-18** (188 mg, 0.68 mmol) as colorless crystals in 68 % overall yield:  $^1\text{H-NMR}$  (500 MHz, DMSO- $d_6$ ):  $\delta_H$  = 8.56 (d,  $^3J_{H,H}$  = 8.0 Hz, 1H), 7.86 (dd,  $^3J_{H,H}$  = 4.9 Hz,  $^4J_{H,H}$  = 1.2 Hz, 1H), 7.78 (dd,  $^3J_{H,H}$  = 3.7 Hz,  $^4J_{H,H}$  = 1.2 Hz, 1H), 7.23 (dd,  $^3J_{H,H}$  = 4.9 Hz, 3.7 Hz, 1H), 7.16 (s, 1H), 3.80 – 3.71 (m, 1H), 1.86 – 1.06 (m, 10H);  $^{13}\text{C-NMR}$  (125 MHz, DMSO- $d_6$ ):  $\delta_C$  = 165.4, 159.8, 157.3, 129.9, 128.6, 128.5, 127.6, 99.1, 48.2, 31.9, 25.0, 24.7; HRMS (ESI,  $m/z$ ):  $[\text{M}+\text{Na}]^+$  calculated for  $[\text{C}_{14}\text{H}_{16}\text{N}_2\text{O}_2\text{NaS}]^+$ : 299.0825, found: 299.0826; combustion analysis (C/H/N/S, %): calculated for  $[\text{C}_{14}\text{H}_{16}\text{N}_2\text{O}_2\text{S}]$ : 60.85 / 5.84 / 10.14 / 11.60, found: 60.46 / 5.78 / 10.04 / 11.30; mp: 180 °C.

#### **N-Cyclopropyl-1H-indole-3-carboxamide (Ox-20)**

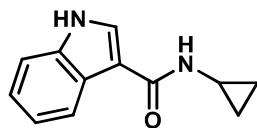

N-Cyclopropyl-1H-indole-3-carboxamide was prepared according to general procedure A employing cyclopropylamine (0.5 mL, 6.83 mmol, 1.10 eq.) and the corresponding acid chloride (1115 mg, 6.21 mmol, 0.31 M, 1.00 eq.). After stirring for 2 hours, the resulting precipitate was collected by filtration, washed with water, subsequently with *i*PrOH, and dried *in vacuo* to afford **Ox-20** as a colorless solid (412 mg, 2.06 mmol) in 33 % yield:  $^1\text{H-NMR}$  (500 MHz, DMSO- $d_6$ ):  $\delta_H$  = 11.47 (br s, 1H), 8.14 (d,  $^3J_{H,H}$  = 8.0 Hz, 1H), 7.96 (d,  $^4J_{H,H}$  = 2.9 Hz, 1H), 7.86 (d,  $^4J_{H,H}$  = 3.2 Hz, 1H), 7.40 (d,  $^3J_{H,H}$  = 8.0 Hz, 1H), 7.13 (td,



$^3J_{H,H} = 7.5$  Hz,  $^4J_{H,H} = 1.3$  Hz, 1H), 7.09 (td,  $^3J_{H,H} = 7.4$  Hz,  $^4J_{H,H} = 1.1$  Hz, 1H), 2.84 – 2.76 (m, 1H), 0.69 – 0.51 (m, 4H);  $^{13}\text{C}$ -NMR (125 MHz, DMSO- $d_6$ ): 165.8, 136.0, 127.5, 126.1, 121.7, 121.0, 120.2, 111.6, 110.5, 22.3, 5.9; HRMS (ESI,  $m/z$ ):  $[\text{M}+\text{Na}]^+$  calculated for  $[\text{C}_{12}\text{H}_{12}\text{N}_2\text{ONa}]^+$ : 223.0842, found: 223.0843; purity (qNMR, 500 MHz, DMSO- $d_6$ , maleic acid): 94 %; mp: 209 °C.

#### **N-Cyclopropyl-3-(p-tolyl)-1,2,4-oxadiazole-5-carboxamide (Ox-21)**

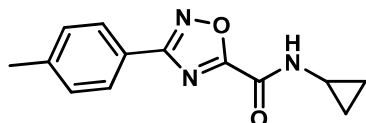

N-Hydroxy-4-methylbenzimidamide (314 mg, 2.09 mmol, 1.00 eq.), methyl 2-chloro-2-oxoacetate (0.58 mL, 6.27 mmol, 3.00 eq.) and  $\text{K}_2\text{CO}_3$  (2.00 eq.) were suspended in MeCN (0.5 M) under an argon-atmosphere, submitted to a microwave device and stirred for 1 h at 120 °C (150 W). The reaction mixture was filtered, concentrated under reduced pressure and finally extracted with EtOAc. The combined organic phase was washed with a saturated aqueous solution of NaCl, dried over  $\text{MgSO}_4$  and concentrated *in vacuo*. Column chromatography (dichloromethane) gave rise to methyl 3-(p-tolyl)-1,2,4-oxadiazole-5-carboxylate (372 mg, 1.70 mmol) as a colourless solid in 81% yield:

$^1\text{H}$ -NMR (500 MHz,  $\text{CDCl}_3$ ):  $\delta_H = 8.03$  (d,  $^3J_{H,H} = 8.3$  Hz, 2H), 7.31 (d,  $^3J_{H,H} = 8.0$  Hz, 2H), 4.10 (s, 3H), 2.42 (s, 3H);  $^{13}\text{C}$ -NMR (125 MHz,  $\text{CDCl}_3$ ): 169.6, 166.3, 154.8, 142.6, 129.9, 127.7, 122.9, 54.3, 21.8; HRMS (ESI,  $m/z$ ):  $[\text{M}+\text{Na}]^+$  calculated for  $[\text{C}_{11}\text{H}_{11}\text{N}_2\text{O}_3]$ : 219.0764, found: 219.0765; combustion analysis (C/H/N, %): calculated for  $[\text{C}_{11}\text{H}_{10}\text{N}_2\text{O}_3 \cdot 0.25 \text{H}_2\text{O}]$ : 59.32 / 12.58 / 4.75, found: 59.69 / 12.62 / 4.75; mp: 94 °C. Following general procedure B, step B3, reaction of the methyl ester (218 mg, 1.00 mmol, 1.00 eq) and cyclopropylamine (0.14 mL, 2.00 mmol, 2 eq.) rendered **Ox-21** (202 mg, 0.83 mmol) as colourless crystals in 83 % yield:  $^1\text{H}$ -NMR (500 MHz, DMSO- $d_6$ ):  $\delta_H = 9.46$  (d,  $^3J_{H,H} = 2.6$  Hz, 1H), 7.94 (d,  $^3J_{H,H} = 8.0$  Hz, 2H), 7.93 (dd,  $^3J_{H,H} = 8.6$  Hz,  $^4J_{H,H} = 0.6$  Hz, 2H), 2.96 – 2.88 (m, 1H), 2.39 (s, 3H), 0.79 – 0.70 (m, 4H);  $^{13}\text{C}$ -NMR (125 MHz, DMSO- $d_6$ ): 169.1, 168.0, 154.0, 142.0, 129.8, 127.1, 122.7, 23.1, 21.0, 5.6; HRMS (ESI,  $m/z$ ):  $[\text{M}+\text{Na}]^+$  calculated for  $[\text{C}_{13}\text{H}_{13}\text{N}_3\text{O}_2\text{Na}]$ : 266.0900, found: 266.0903; combustion analysis (C/H/N, %): calculated for  $[\text{C}_{13}\text{H}_{13}\text{N}_3\text{O}_2]$ : 64.19 / 5.39 / 17.27, found: 64.16 / 5.37 / 17.36; mp: 132 °C.

#### **N-Ethyl-5-(thiophen-2-yl)isoxazol-3-carboxamide (Ox-22)**

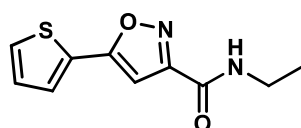

**Ox-22** (127 mg, 0.57 mmol) was obtained as colorless crystals in 57 % overall yield employing ethylamine (60 % v/v in water, 0.17 mL, 2.00 eq.) and the respective methyl ester (209 mg, 1.00 mmol, 1.00 eq.) according to general procedure B, step B3:  $^1\text{H-NMR}$  (500 MHz, DMSO- $d_6$ ):  $\delta_H$  = 8.77 (t,  $^3J_{H,H}$  = 5.3 Hz, 1H), 7.86 (dd,  $^3J_{H,H}$  = 5.1 Hz,  $^4J_{H,H}$  = 1.3 Hz, 1H), 7.78 (dd,  $^3J_{H,H}$  = 3.6 Hz,  $^4J_{H,H}$  = 1.3 Hz, 1H), 7.26 (dd,  $^3J_{H,H}$  = 4.9 Hz, 3.7 Hz, 1H), 7.16 (s, 1H), 3.29 (dq,  $^3J_{H,H}$  = 7.2 Hz, 6.0 Hz, 2H, overlaid by H<sub>2</sub>O signal), 1.12 (t,  $^3J_{H,H}$  = 7.2 Hz, 3H);  $^{13}\text{C-NMR}$  (125 MHz, DMSO- $d_6$ ):  $\delta_C$  = 165.5, 159.7, 157.9, 130.0, 128.7, 128.6, 127.5, 99.0, 33.7, 14.4; HRMS (ESI,  $m/z$ ): [M+Na]<sup>+</sup> calculated for [C<sub>10</sub>H<sub>10</sub>N<sub>2</sub>O<sub>2</sub>NaS]<sup>+</sup>: 245.0355, found: 245.0356; combustion analysis (C/H/N, %): calculated for [C<sub>10</sub>H<sub>10</sub>N<sub>2</sub>O<sub>2</sub>S]: 54.04 / 4.54 / 12.60, found: 53.95 / 4.51 / 12.58; mp: 125 °C.

#### **N-((5-(Thiophen-2-yl)isoxazol-3-yl)methyl)cyclopropanamin (Ox-24)**

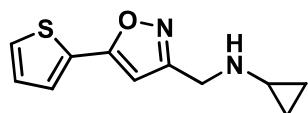

To an ice-cooled solution of methyl-5-(thiophen-2-yl)isoxazol-3-carboxylate (512 mg, 2.45 mmol, 1.00 eq.) in methanol (4.90 mL), NaBH<sub>4</sub> (370 mg, 9.79 mmol, 4.00 eq.) was added portion-wise, warmed to room temperature and stirred overnight. The reaction mixture was quenched by the addition of water, acidified with HCl (1.00 M) and finally extracted with DCM. The combined organic layers were dried over MgSO<sub>4</sub>, filtered, and concentrated in vacuo giving rise to (5-(thiophen-2-yl)isoxazol-3-yl)methanol (438 mg, 2.42 mmol) in 99 % yield. A solution of the alcohol (430 mg, 2.37 mmol, 1.00 eq.), Et<sub>3</sub>N (0.69 mL, 4.98 mmol, 2.10 eq.) and MsCl (0.24 mL, 3.08 mmol, 1.30 eq.) in DCM (12.00 mL) was stirred for 1 hour at room temperature, quenched with water (100.0 mL) and extracted with DCM. The combined organic layers were dried over MgSO<sub>4</sub>, filtered, concentrated and immediately used for the next reaction step.

The freshly prepared mesylate (615 mg, 2.37 mmol) and cyclopropylamine (0.33 mL) were dissolved in *i*PrOH (1.0 M), submitted to a microwave device, stirred for 2 h at 100 °C (300 W) and concentrated *in vacuo*. Column chromatography (DCM) rendered **Ox-24** (150 mg, 0.68 mmol) in 29 % yield (over two steps) as yellow solid:  $^1\text{H-NMR}$  (500 MHz, DMSO- $d_6$ ):  $\delta_H$  = 7.79 (dd,  $^3J_{H,H}$  = 4.9 Hz,  $^4J_{H,H}$  = 1.2 Hz, 1H), 7.66 (dd,  $^3J_{H,H}$  = 3.7 Hz,  $^4J_{H,H}$  = 1.2 Hz, 1H), 7.23 (dd,  $^3J_{H,H}$  = 4.9 Hz, 3.7 Hz, 1H), 6.80 (s, 1H), 3.77 (s, 2H), 2.85 (br s, 1H), 2.09 (sm, 1H), 0.38 – 0.24 (m, 4H);  $^{13}\text{C-NMR}$  (125 MHz, DMSO- $d_6$ ):  $\delta_C$  = 164.3, 163.7, 129.0, 128.51, 128.49, 127.4, 99.3, 43.7, 29.7, 6.1; HRMS (ESI,  $m/z$ ): [M+H]<sup>+</sup> calculated for [C<sub>11</sub>H<sub>13</sub>N<sub>2</sub>OS]<sup>+</sup>: 221.0743, found: 221.0744; combustion analysis (C/H/N/S, %): calculated for [C<sub>11</sub>H<sub>12</sub>N<sub>2</sub>OS] \* 0.25 H<sub>2</sub>O: 58.77 / 5.60 / 12.46 / 14.26, found: 58.90 / 5.42 / 12.78 / 13.95.

**N-Cyclopropyl-5-(*p*-tolyl)isoxazol-3-carboxamide (Ox-25)**

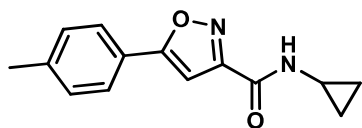

Following general procedure B, step B1 (method B), employing 1-(*p*-tolyl)ethan-1-one (1342 mg, 10.00 mmol) rendered methyl-(*Z*)-2-hydroxy-4-oxo-4-(*p*-tolyl)but-2-enoate (757 mg, 3.43 mmol) in 34 % yield. Reaction of this intermediate (746 mg, 3.39 mmol) according to general procedure B, step B2, gave rise to methyl-5-(*p*-tolyl)isoxazol-3-carboxylate (494 mg, 2.27 mmol) in 67 % yield:  $^1\text{H-NMR}$  (500 MHz, DMSO- $d_6$ ):  $\delta_H$  = 7.84 (d,  $^3J_{H,H}$  = 8.3 Hz, 2H), 7.41 (s, 1H), 7.36 (d,  $^3J_{H,H}$  = 8.0 Hz, 2H), 3.92 (s, 3H), 2.37 (s, 3H);  $^{13}\text{C-NMR}$  (125 MHz, DMSO- $d_6$ ):  $\delta_C$  = 171.3, 159.8, 156.6, 141.0, 129.8, 125.7, 123.4, 100.1, 52.8, 21.0; HRMS (ESI,  $m/z$ ):  $[\text{M}+\text{Na}]^+$  calculated for  $[\text{C}_{12}\text{H}_{11}\text{NO}_3\text{Na}]^+$ : 240.0631, found: 240.0632; combustion analysis (C/H/N, %): calculated for  $[\text{C}_{12}\text{H}_{11}\text{NO}_3]$ : 66.35 / 5.10 / 6.45, found: 66.28 / 5.14 / 6.36; mp: 117 °C.

Employing the corresponding methyl ester (221 mg, 1.00 mmol, 1.00 eq.) and cyclopropylamine (0.14 mL, 2.01 mmol, 2.01 eq.) gave rise to **Ox-25** (125 mg, 0.52 mmol) in 52 % yield:  $^1\text{H-NMR}$  (500 MHz, DMSO- $d_6$ ):  $\delta_H$  = 8.80 (d,  $^3J_{H,H}$  = 4.3 Hz, 1H), 7.80 (d,  $^3J_{H,H}$  = 8.3 Hz, 2H), 7.36 (d,  $^3J_{H,H}$  = 8.0 Hz, 2H), 7.24 (s, 1H), 2.90 – 2.83 (m, 1H), 2.37 (s, 3H), 0.73 – 0.62 (m, 4H);  $^{13}\text{C-NMR}$  (125 MHz, DMSO- $d_6$ ):  $\delta_C$  = 170.3, 159.7, 159.5, 140.7, 129.8, 125.7, 123.6, 99.1, 22.7, 21.0, 5.6; HRMS (ESI,  $m/z$ ):  $[\text{M}+\text{Na}]^+$  calculated for  $[\text{C}_{14}\text{H}_{14}\text{N}_2\text{O}_2\text{Na}]^+$ : 265.0947, found: 265.0948; purity (qNMR, 500 MHz, DMSO- $d_6$ , maleic acid): 97 %; mp: 164 °C.

**N-Cyclopropyl-5-(naphthalen-2-yl)isoxazol-3-carboxamide (Ox-26)**

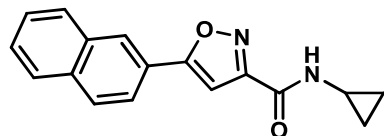

Following general procedure B, step B1 (method B), reaction of 1-(Naphthalen-2-yl)ethan-1-one (1702 mg, 10.00 mmol) provided intermediate methyl-(*Z*)-2-hydroxy-4-(naphthalen-2-yl)-4-oxobut-2-enoate (1722 mg, 6.72 mmol) in 67 % yield. Following general procedure B, step B2, employing methyl-(*Z*)-2-hydroxy-4-(naphthalen-2-yl)-4-oxobut-2-enoate (1711 mg, 6.68 mmol) furnished methyl-5-(naphthalen-2-yl)isoxazol-3-carboxylate (930 mg, 3.67 mmol) in 55 % yield:  $^1\text{H-NMR}$  (500 MHz, DMSO- $d_6$ ):  $\delta_H$  = 8.56 (d,  $^4J_{H,H}$  = 0.9 Hz, 1H), 8.10 – 7.97 (m, 4H), 7.64 – 7.61 (m, 2H), 7.60 (s, 1H), 3.95 (s, 3H);  $^{13}\text{C-NMR}$  (125 MHz, DMSO- $d_6$ ):  $\delta_C$  = 171.1, 159.8, 156.7, 133.7, 132.5, 129.0, 128.7, 127.7, 127.1, 125.6, 123.3, 122.7, 101.1, 52.8; HRMS (ESI,  $m/z$ ):  $[\text{M}+\text{Na}]^+$  calculated for  $[\text{C}_{15}\text{H}_{11}\text{NO}_3\text{Na}]^+$ : 276.0631, found:

276.0632; combustion analysis (C/H/N, %): calculated for  $[C_{15}H_{11}NO_3]$ : 71.14 / 4.38 / 5.53, found: 71.22 / 4.42 / 5.47; mp: 126 °C.

Following general procedure B, step B3, methyl-5-(naphthalen-2-yl)isoxazol-3-carboxylate (380 mg, 1.50 mmol, 1.00 eq) and cyclopropylamine (0.21 mL, 3.02 mmol, 2.01 eq.) were subjected to a microwave device for 4 hours. Column chromatography (DCM) rendered **Ox-26** (142 mg, 0.51 mmol) in 34 % yield:  $^1H$ -NMR (500 MHz, DMSO- $d_6$ ):  $\delta_H$  = 8.88 (d,  $^3J_{H,H}$  = 4.6 Hz, 1H), 8.54 (d,  $^4J_{H,H}$  = 1.2 Hz, 1H), 8.10 – 7.96 (m, 4H), 7.63 – 7.59 (m, 2H), 7.44 (s, 1H), 2.94 – 2.86 (m, 1H), 0.74 – 0.64 (m, 4H);  $^{13}C$ -NMR (125 MHz, DMSO- $d_6$ ):  $\delta_C$  = 170.2, 159.7, 159.6, 133.6, 132.6, 129.0, 128.7, 127.6, 127.1, 125.4, 123.6, 122.8, 100.2, 22.8, 5.6; HRMS (ESI,  $m/z$ ):  $[M+Na]^+$  calculated for  $[C_{17}H_{14}N_2O_2Na]^+$ : 301.0947, found: 301.0949; combustion analysis (C/H/N, %): calculated for  $[C_{17}H_{14}N_2O_2]$ : 73.37 / 5.07 / 10.07, found: 73.25 / 5.08 / 9.99; mp: 185 °C.

#### **N-Ethyl-N-methyl-5-(thiophen-2-yl)isoxazol-3-carboxamide (Ox-27)**

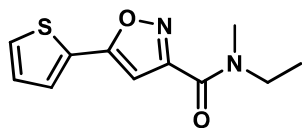

To a solution of **Ox-22** (42 mg, 0.19 mmol) in DMF (1.0 mL), NaH (60 % w/w in mineral oil, 10 mg, 0.40 mmol, 2.10 eq.) and MeI (0.01 mL, 0.20 mmol, 1.05 eq.) were added and stirred for 1 hour at room temperature. The reaction mixture was diluted with DCM, washed with an aqueous solution of LiCl (5 % w/w), dried over  $MgSO_4$ , filtered, and finally concentrated in vacuo giving rise to **Ox-27** (42 mg, 0.18 mmol) as colorless crystals in 94 % yield:  $^1H$ -NMR (500 MHz, DMSO- $d_6$ , rotamers):  $\delta_H$  = 7.86 (dd,  $^3J_{H,H}$  = 5.0 Hz,  $^4J_{H,H}$  = 1.0 Hz, 1H), 7.77 (dt,  $^3J_{H,H}$  = 3.3 Hz,  $^4J_{H,H}$  = 1.2 Hz, 1H), 7.27 (dd,  $^3J_{H,H}$  = 5.0 Hz, 3.9 Hz, 1H), 7.09 + 7.08 (s, 3H), 3.50 + 3.44 (q,  $^3J_{H,H}$  = 7.2 Hz + 7.1 Hz, 2H), 3.08 + 3.00 (s, 3H), 1.17 – 1.12 (m, 3H);  $^{13}C$ -NMR (125 MHz, DMSO- $d_6$ , rotamers):  $\delta_C$  = 164.7, 164.6, 159.9, 159.6, 159.5, 159.3, 130.00, 129.96, 128.63, 128.58, 128.5, 127.50, 127.48, 99.8, 99.6, 45.0, 42.0, 35.5, 32.2, 13.7, 11.7; HRMS (ESI,  $m/z$ ):  $[M+H]^+$  calculated for  $[C_{11}H_{13}N_2O_2S]^+$ : 237.0692, found: 237.0693; combustion analysis (C/H/N/S, %): calculated for  $[C_{11}H_{12}N_2O_2S]$ : 55.92 / 5.12 / 11.86 / 13.57, found: 55.60 / 4.96 / 11.86 / 13.21; mp: 82 °C.

#### **N-Cyclopropyl-3-(thiophen-2-yl)-1,2,4-oxadiazole-5-carboxamide (Ox-28)**

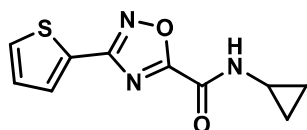

To a solution of thiophene-2-carbonitril in EtOH (1.00 mL, 10.72 mmol),  $\text{NH}_2\text{OH}^+\text{HCl}$  (1.50 eq.) and DIPEA (1.60 eq.) were added. The reaction mixture was heated to reflux for 4 h, concentrated *in vacuo*, redissolved in EtOAc/ $\text{H}_2\text{O}$  and extracted with EtOAc. The combined organic phase was washed with  $\text{H}_2\text{O}$  (x2) and subsequently with a saturated aqueous solution of NaCl, dried over  $\text{MgSO}_4$  and concentrated *in vacuo* to afford *N*-hydroxythiophene-2-carboximidamide as a colourless solid (1506 mg, 10.59 mmol) in 99 % yield:  $^1\text{H-NMR}$  (300 MHz,  $\text{DMSO-d}_6$ ):  $\delta_{\text{H}} = 9.59$  (s, 1H), 7.50 – 7.34 (m, 2H), 7.04 (dd,  $^3J_{\text{H,H}} = 5.1, 3.6$  Hz, 1H, 5.90 (br s, 2H). [3]

In the following step, *N*-hydroxythiophene-2-carboximidamide (284 mg, 2.00 mmol, 1.00 eq.), methyl 2-chloro-2-oxoacetate (0.55 mL, 6.00 mmol, 3.00 eq.) and  $\text{K}_2\text{CO}_3$  (2.00 eq.) were suspended in MeCN (0.5 M) under an argon-atmosphere, submitted to a microwave device and stirred for 1 h at 120 °C (150 W). The reaction mixture was filtered, concentrated under reduced pressure and finally extracted with EtOAc. The combined organic phase was washed with a saturated aqueous solution of NaCl, dried over  $\text{MgSO}_4$  and concentrated *in vacuo*. Column chromatography (dichloromethane) gave rise to methyl 3-(thiophen-2-yl)-1,2,4-oxadiazole-5-carboxylate (231 mg, 1.10 mmol) as light-yellow solid in 55 % yield:  $^1\text{H-NMR}$  (500 MHz,  $\text{DMSO-d}_6$ ):  $\delta_{\text{H}} = 7.95$  (dd,  $^3J_{\text{H,H}} = 5.0$  Hz,  $^4J_{\text{H,H}} = 1.3$  Hz, 1H), 7.89 (dd,  $^3J_{\text{H,H}} = 3.7$  Hz,  $^4J_{\text{H,H}} = 1.1$  Hz, 1H), 7.30 (dd,  $^3J_{\text{H,H}} = 4.8, 3.7$  Hz, 1H), 3.99 (s, 3H);  $^{13}\text{C-NMR}$  (125 MHz,  $\text{DMSO-d}_6$ ): 166.6, 164.6, 154.0, 131.5, 130.7, 128.7, 126.3, 53.8; HRMS (ESI,  $m/z$ ):  $[\text{M}+\text{Na}]^+$  calculated for  $[\text{C}_8\text{H}_6\text{N}_2\text{O}_3\text{NaS}]^+$ : 232.9991, found: 232.9992; combustion analysis (C/H/N/S, %): calculated for  $[\text{C}_8\text{H}_6\text{N}_2\text{O}_3\text{S}]$ : 45.71 / 2.88 / 13.33 / 15.25, found: 45.74 / 2.90 / 13.32 / 15.17; mp: 75 °C. Following general procedure B, step B3 reaction of the methyl ester (158 mg, 0.75 mmol, 1.00 eq) and cyclopropylamine (0.10 mL, 1.50 mmol, 2 eq.) rendered **Ox-28** (143 mg, 0.61 mmol) as colourless crystals in 81 % yield:  $^1\text{H-NMR}$  (500 MHz,  $\text{DMSO-d}_6$ ):  $\delta_{\text{H}} = 9.49$  (s, 1H), 7.93 (dd,  $^3J_{\text{H,H}} = 5.0$  Hz,  $^4J_{\text{H,H}} = 1.3$  Hz, 1H), 7.86 (dd,  $^3J_{\text{H,H}} = 3.7$  Hz,  $^4J_{\text{H,H}} = 1.2$  Hz, 1H), 7.30 (dd,  $^3J_{\text{H,H}} = 5.2, 3.7$  Hz, 1H), 2.94 – 2.89 (m, 1H), 0.77 – 0.70 (m, 4H);  $^{13}\text{C-NMR}$  (125 MHz,  $\text{DMSO-d}_6$ ): 169.0, 164.1, 153.8, 131.3, 130.5, 128.6, 126.6, 23.1, 5.5; HRMS (ESI,  $m/z$ ):  $[\text{M}+\text{Na}]^+$  calculated for  $[\text{C}_{10}\text{H}_9\text{N}_3\text{O}_2\text{NaS}]$ : 258.0308, found: 258.0308; combustion analysis (C/H/N/S, %): calculated for  $[\text{C}_{10}\text{H}_9\text{N}_3\text{O}_2\text{S}]$ : 51.05 / 3.86 / 17.86 / 13.63, found: 51.06 / 3.87 / 17.83 / 13.34.; mp: 125 °C.

#### 5-(4-(Benzyloxy)phenyl)-*N*-cyclopropylisoxazol-3-carboxamide (Ox-29)

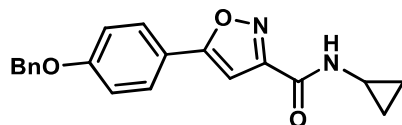

Following general procedure B step B1 (method B) reaction of 1-(4-(benzyloxy)phenyl)ethan-1-one (905 mg, 4.00 mmol) provided intermediate methyl-(*Z*)-4-(4-(benzyloxy)phenyl)-2-hydroxy-4-oxobut-

2-enoate (433 mg, 1.39 mmol) in 35 % yield. Reaction of this intermediate (433 mg, 1.39 mmol) following general procedure B, step B2, gave rise to methyl-5-(4-(benzyloxy)phenyl)isoxazol-3-carboxylate (238 mg, 0.77 mmol) in 55 % yield:  $^1\text{H-NMR}$  (500 MHz,  $\text{DMSO-d}_6$ ):  $\delta_{\text{H}} = 7.89$  (d,  $^3J_{\text{H,H}} = 8.9$  Hz, 2H), 7.50 – 7.31 (m, 6H), 7.18 (d,  $^3J_{\text{H,H}} = 8.9$  Hz, 2H), 5.20 (s, 2H), 3.92 (s, 3H);  $^{13}\text{C-NMR}$  (125 MHz,  $\text{DMSO-d}_6$ ):  $\delta_{\text{C}} = 171.1, 160.3, 159.9, 156.5, 136.5, 128.4, 127.9, 127.7, 127.6, 118.9, 115.6, 99.3, 69.4, 52.7$ ; HRMS (ESI,  $m/z$ ):  $[\text{M}+\text{H}]^+$  calculated for  $[\text{C}_{18}\text{H}_{16}\text{NO}_4]^+$ : 310.1074, found: 310.1079; combustion analysis (C/H/N, %): calculated for  $[\text{C}_{18}\text{H}_{15}\text{NO}_4]$ : 69.89 / 4.89 / 4.53, found: 69.92 / 4.89 / 4.42; mp: 139 °C.

Following general procedure B, step B3, methyl-5-(4-(benzyloxy)phenyl)isoxazol-3-carboxylate (302 mg, 0.98 mmol, 1.00 eq.) and cyclopropylamine (0.14 mL, 1.95 mmol, 2.00 eq.) were subjected to a microwave device (300W) for 4 hours. Column chromatography (DCM) rendered **Ox-29** (253 mg, 0.76 mmol) in 77 % yield:  $^1\text{H-NMR}$  (500 MHz,  $\text{DMSO-d}_6$ ):  $\delta_{\text{H}} = 8.78$  (d,  $^3J_{\text{H,H}} = 4.6$  Hz, 1H), 7.85 (d,  $^3J_{\text{H,H}} = 8.9$  Hz, 2H), 7.49 – 7.31 (m, 5H), 7.19 – 7.15 (m, 3H), 5.20 (s, 2H), 2.89 – 2.84 (m, 1H), 0.74 – 0.61 (m, 4H);  $^{13}\text{C-NMR}$  (125 MHz,  $\text{DMSO-d}_6$ ):  $\delta_{\text{C}} = 170.2, 160.2, 159.7, 159.5, 136.6, 128.4, 127.9, 127.7, 127.5, 119.2, 115.5, 98.3, 69.4, 22.7, 5.6$ ; HRMS (ESI,  $m/z$ ):  $[\text{M}+\text{Na}]^+$  calculated for  $[\text{C}_{20}\text{H}_{18}\text{N}_2\text{O}_3\text{Na}]^+$ : 357.1210, found: 357.1209; combustion analysis (C/H/N, %): calculated for  $[\text{C}_{20}\text{H}_{18}\text{N}_2\text{O}_3]$ : 71.84 / 5.43 / 8.38, found: 71.58 / 5.44 / 8.32; mp: 180 °C.

#### **N-Cyclopropyl-5-(4-hydroxyphenyl)isoxazole-3-carboxamide (Ox-31)**

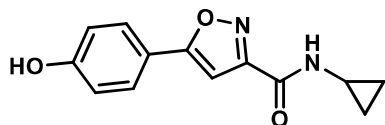

1-(4-Hydroxyphenyl)ethan-1-one (1362 mg, 10.00 mmol, 1.00 eq.), imidazole (1021 mg, 15.00 mmol, 1.50 eq.) and TBSCl (1959 mg, 13.00 mmol, 1.30 eq.) were dissolved in DMF (17.00 mL) and the resulting solution was stirred overnight at room temperature. The reaction mixture was diluted with  $c\text{Hex}$  /  $\text{Et}_2\text{O}$  (1:1, 100 mL), the organic layer washed with water  $\text{H}_2\text{O}$  (3x), a saturated aqueous NaCl solution, dried over  $\text{MgSO}_4$ , and concentrated in vacuo yielding 1-(4-((*tert*-butyldimethylsilyl)oxy)phenyl)ethan-1-one (2410 mg, 9.62 mmol) as colorless solid in 96 % yield. [4] According to general procedure B step B1 (A2) reaction of 1-(4-((*tert*-butyldimethylsilyl)oxy)phenyl)ethan-1-on (2300 mg, 9.18 mmol) rendered methyl-(*Z*)-4-(4-((*tert*-butyldimethylsilyl)oxy)phenyl)-2-hydroxy-4-oxobut-2-enoate (1362 mg, 4.05 mmol) in 44 % yield. Reaction of methyl-(*Z*)-4-(4-((*tert*-butyldimethylsilyl)oxy)phenyl)-2-hydroxy-4-oxobut-2-enoate (1362 mg, 4.05 mmol) and  $\text{NH}_2\text{OH}^+\text{HCl}$  (general procedure B step B2) furnished methyl-5-(4-hydroxyphenyl)isoxazol-3-carboxylate as purple solid (52 % yield, crude product) which was used

without further purification in the next step. Utilization of the crude reaction product and cyclopropylamine (0.14 mL) according to procedure B, step B3 gave rise to *N*-cyclopropyl-5-(4-hydroxyphenyl)isoxazole-3-carboxamide **Ox-31** (122 mg, 0.50 mmol) in 50 % yield:  $^1\text{H-NMR}$  (500 MHz, DMSO- $d_6$ ):  $\delta_H$  = 10.09 (s, 1H), 8.76 (d,  $^3J_{H,H}$  = 4.3 Hz, 1H), 7.73 (d,  $^3J_{H,H}$  = 8.9 Hz, 2H), 7.06 (s, 1H), 6.90 (d,  $^3J_{H,H}$  = 8.9 Hz, 2H), 2.86 (sm, 1H), 0.74 – 0.58 (m, 4H);  $^{13}\text{C-NMR}$  (125 MHz, DMSO- $d_6$ ):  $\delta_C$  = 170.6, 159.8, 159.7, 159.4, 127.6, 117.5, 116.0, 97.5, 22.7, 5.6; HRMS (ESI,  $m/z$ ):  $[\text{M}+\text{Na}]^+$  calculated for  $[\text{C}_{13}\text{H}_{12}\text{N}_2\text{O}_3\text{Na}]^+$ : 267.0740, found: 267.0740; combustion analysis (C/H/N, %): calculated for  $[\text{C}_{13}\text{H}_{12}\text{N}_2\text{O}_3]$ : 63.93 / 4.95 / 11.47, found: 63.89 / 4.98 / 11.42; mp: 191 °C.

#### ***N*-Cyclopropyl-5-(4-(hydroxymethyl)phenyl)isoxazol-3-carboxamide (Ox-32)**

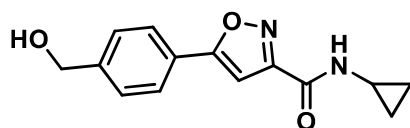

1-(4-(Hydroxymethyl)phenyl)ethan-1-one (6758 mg, 45.00 mmol, 1.00 eq.),  $\text{Et}_3\text{N}$  (9.40 mL, 67.50 mmol, 1.50 eq.), DMAP (catalytic amount) and TBSCl (8817 mg, 58.50 mmol, 1.30 eq.) were dissolved in DCM (90.00 mL) and stirred at room temperature overnight. The solvent was removed in vacuo, the remaining residue re-dissolved in *c*Hex, stirred for 3 hours and finally filtered to remove insoluble material. The remaining organic phase was washed with water, a saturated aqueous NaCl solution, dried over  $\text{MgSO}_4$ , filtered, and concentrated in vacuo. Bulb to bulb distillation gave rise to 1-(4-(((tert-butyl)dimethylsilyl)oxy)methyl)phenyl)ethan-1-one (11.71 g, 44.28 mmol) as slightly yellow oil in 98 % yield.

Following general procedure B, step B1 (method A2), reaction of 1-(4-(((tert-butyl)dimethylsilyl)oxy)methyl)phenyl)ethan-1-one (2300 mg, 8.69 mmol) provided intermediate methyl-(*Z*)-4-(4-(((tert-butyl)dimethylsilyl)oxy)methyl)phenyl)-2-hydroxy-4-oxobut-2-enoate (1613 mg, 4.60 mmol) in 53 % yield.

Reaction of this intermediate (1613 mg, 4.60 mmol) following general procedure B step B2 gave rise to methyl-5-(4-hydroxyphenyl)isoxazol-3-carboxylate (414 mg, 1.60 mmol) in 39 % yield:  $^1\text{H-NMR}$  (500 MHz, DMSO- $d_6$ ):  $\delta_H$  = 7.91 (d,  $^3J_{H,H}$  = 8.6 Hz, 2H), 7.49 (d,  $^3J_{H,H}$  = 8.6 Hz, 2H), 7.45 (s, 1H), 5.33 (t,  $^3J_{H,H}$  = 5.7 Hz, 1H), 4.57 (d,  $^3J_{H,H}$  = 5.7 Hz, 2H), 3.93 (s, 3H);  $^{13}\text{C-NMR}$  (125 MHz, DMSO- $d_6$ ):  $\delta_C$  = 171.2, 159.8, 156.6, 145.8, 127.0, 125.6, 124.4, 100.3, 62.4, 52.8; HRMS (ESI,  $m/z$ ):  $[\text{M}+\text{Na}]^+$  calculated for  $[\text{C}_{12}\text{H}_{11}\text{NO}_4\text{Na}]^+$ : 256.0580, found: 256.0584; combustion analysis (C/H/N, %): calculated for  $[\text{C}_{12}\text{H}_{11}\text{NO}_4]$ : 61.80 / 4.75 / 6.01, found: 61.31 / 4.76 / 5.85; mp: 131 °C.

Following general procedure B, step B3, methyl-5-(4-hydroxyphenyl)isoxazol-3-carboxylate (233 mg, 1.00 mmol, 1.00 eq.) and cyclopropylamine (0.14 mL, 2.00 mmol, 2.00 eq.) rendered **Ox-32** (147 mg,

0.57 mmol) in 57 % yield:  $^1\text{H-NMR}$  (500 MHz, DMSO- $d_6$ ):  $\delta_H$  = 8.79 (d,  $^3J_{H,H}$  = 4.2 Hz, 1H), 7.88 (d,  $^3J_{H,H}$  = 8.3 Hz, 2H), 7.48 (d,  $^3J_{H,H}$  = 8.3 Hz, 2H), 7.28 (s, 1H), 5.34 (t,  $^3J_{H,H}$  = 5.9 Hz, 1H), 4.57 (d,  $^3J_{H,H}$  = 5.7 Hz, 2H), 2.87 (sm, 1H), 0.80–0.55 (m, 4H);  $^{13}\text{C-NMR}$  (125 MHz, DMSO- $d_6$ ):  $\delta_C$  = 170.3, 159.6, 159.5, 145.6, 127.0, 125.5, 124.7, 99.3, 62.4, 22.7, 5.6; HRMS (ESI,  $m/z$ ):  $[\text{M}+\text{Na}]^+$  calculated for  $[\text{C}_{14}\text{H}_{14}\text{N}_2\text{O}_3\text{Na}]^+$ : 281.0897, found: 281.0900; combustion analysis (C/H/N, %): calculated for  $[\text{C}_{14}\text{H}_{14}\text{N}_2\text{O}_3]$ : 65.11 / 5.46 / 10.85, found: 65.16 / 5.50 / 10.75; mp: 179 °C.

### **N-Cyclopropyl-5-(*o*-tolyl)isoxazol-3-carboxamide (Ox-36)**

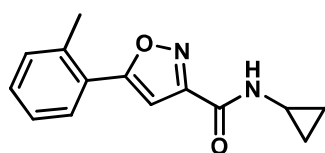

Following general procedure B, step B1, reaction of 1-(*o*-tolyl)ethan-1-one (2013 mg, 15.00 mmol) provided intermediate methyl-(*Z*)-2-hydroxy-4-oxo-4-(*o*-tolyl)but-2-enoate (1122 mg, 5.10 mmol) in 34 % yield.

Following general procedure B, step B2, employing methyl-(*Z*)-2-hydroxy-4-oxo-4-(*o*-tolyl)but-2-enoate (1122 mg, 5.10 mmol) rendered methyl-5-(*o*-tolyl)isoxazol-3-carboxylate (737 mg, 3.39 mmol) in 66 % yield:  $^1\text{H-NMR}$  (500 MHz, DMSO- $d_6$ ):  $\delta_H$  = 7.77 (dd,  $^3J_{H,H}$  = 7.7 Hz,  $^4J_{H,H}$  = 1.4 Hz, 1H), 7.49 - 7.34 (m, 3H), 7.21 (s, 1H), 3.94 (s, 3H), 2.48 (s, 3H);  $^{13}\text{C-NMR}$  (125 MHz, DMSO- $d_6$ ):  $\delta_C$  = 171.1, 159.8, 156.2, 136.1, 131.4, 130.7, 128.4, 126.4, 125.6, 103.3, 52.8, 20.7; HRMS (ESI,  $m/z$ ):  $[\text{M}+\text{Na}]^+$  calculated for  $[\text{C}_{12}\text{H}_{11}\text{NO}_3\text{Na}]^+$ : 240.0631, found: 240.0633; combustion analysis (C/H/N, %): calculated for  $[\text{C}_{12}\text{H}_{11}\text{NO}_3]$ : 66.35 / 5.10 / 6.45, found: 66.28 / 5.14 / 6.41; mp: 51 °C.

Reaction of methyl-5-(*o*-tolyl)isoxazol-3-carboxylate (348 mg, 1.6 mmol, 1.00 eq.) and cyclopropylamine (0.22 mL, 3.16 mmol, 1.98 eq.) following general procedure B, step B3, rendered **Ox-36** (97 mg, 0.40 mmol) after column chromatography (cHex/EtOAc, 4:1) in 25 % yield:  $^1\text{H-NMR}$  (500 MHz, DMSO- $d_6$ ):  $\delta_H$  = 8.83 (d,  $^3J_{H,H}$  = 4.3 Hz, 1H), 7.72 (dd,  $^3J_{H,H}$  = 7.6 Hz,  $^4J_{H,H}$  = 1.3 Hz, 1H), 7.45 - 7.35 (m, 3H), 7.07 (s, 1H), 2.87 (sm, 1H), 2.47 (s, 3H), 0.73 - 0.61 (m, 4H);  $^{13}\text{C-NMR}$  (125 MHz, DMSO- $d_6$ ):  $\delta_C$  = 170.1, 159.6, 159.1, 135.8, 131.8, 130.2, 128.0, 126.4, 125.9, 102.3, 22.7, 20.8, 5.6; HRMS (ESI,  $m/z$ ):  $[\text{M}+\text{Na}]^+$  calculated for  $[\text{C}_{14}\text{H}_{14}\text{N}_2\text{O}_2\text{Na}]^+$ : 265.0947, found: 265.0949; combustion analysis (C/H/N, %): calculated for  $[\text{C}_{14}\text{H}_{14}\text{N}_2\text{O}_2]$ : 69.41 / 5.82 / 11.56, found: 69.22 / 5.84 / 11.49; mp: 105 °C.

### **N-Cyclopropyl-5-(*m*-tolyl)isoxazol-3-carboxamide (Ox-37)**



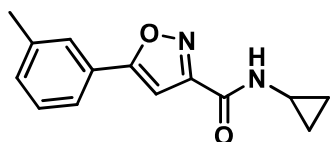

Reaction of 1-(*m*-tolyl)ethan-1-one (2012 mg, 15.00 mmol) following general procedure B, step B1 (method A) furnished methyl-(*Z*)-2-hydroxy-4-oxo-4-(*m*-tolyl)but-2-enoate (1120 mg, 5.09 mmol) in 34 % yield.

Subsequent reaction of this intermediate 1120 mg, 5.09 mmol) according to general procedure B, step B2 gave rise to methyl-5-(*m*-tolyl)isoxazol-3-carboxylate (746 mg, 3.34 mmol) in 67 % yield:  $^1\text{H-NMR}$  (500 MHz,  $\text{DMSO-d}_6$ ):  $\delta_{\text{H}}$  = 7.79 (s, 1H), 7.74 (d,  $^3J_{\text{H,H}}$  = 7.7 Hz, 1H), 7.45 (s, 1H), 7.44 (d,  $^3J_{\text{H,H}}$  = 7.7 Hz, 1H), 7.36 (d,  $^3J_{\text{H,H}}$  = 7.7 Hz, 1H), 3.93 (s, 3H), 2.39 (s, 3H);  $^{13}\text{C-NMR}$  (125 MHz,  $\text{DMSO-d}_6$ ):  $\delta_{\text{C}}$  = 171.2, 159.8, 156.6, 138.7, 131.6, 129.1, 126.1, 125.9, 122.9, 100.6, 52.7, 20.8; HRMS (ESI,  $m/z$ ):  $[\text{M}+\text{Na}]^+$  calculated for  $[\text{C}_{12}\text{H}_{11}\text{NO}_3\text{Na}]^+$ : 240.0631, found: 240.0634; mp: 118 °C.

Reaction of methyl-5-(*m*-tolyl)isoxazol-3-carboxylate (326 mg, 1.50 mmol, 1.00 eq.) and cyclopropylamine (0.20 mL, 2.87 mmol, 1.91 eq.) following general procedure B, step B3, rendered **Ox-37** (66 mg, 0.27 mmol) after column chromatography (cHex/EtOAc, 4:1) in 18 % yield:  $^1\text{H-NMR}$  (500 MHz,  $\text{DMSO-d}_6$ ):  $\delta_{\text{H}}$  = 8.80 (d,  $^3J_{\text{H,H}}$  = 4.3 Hz, 1H), 7.77 - 7.72 (m, 1H), 7.72 - 7.68 (m, 1H), 7.43 (t,  $^3J_{\text{H,H}}$  = 7.7 Hz, 1H), 7.36 - 7.32 (m, 1H), 7.24 (s, 1H), 2.90 – 2.83 (m, 1H), 2.37 (s, 3H), 0.73 – 0.62 (m, 4H);  $^{13}\text{C-NMR}$  (125 MHz,  $\text{DMSO-d}_6$ ):  $\delta_{\text{C}}$  = 170.3, 159.6, 159.5, 138.7, 131.4, 129.1, 126.2, 126.1, 122.9, 99.6, 22.7, 20.8, 5.5; HRMS (ESI,  $m/z$ ):  $[\text{M}+\text{Na}]^+$  calculated for  $[\text{C}_{14}\text{H}_{14}\text{N}_2\text{O}_2\text{Na}]^+$ : 265.0947, found: 265.0951; combustion analysis (C/H/N, %): calculated for  $[\text{C}_{14}\text{H}_{14}\text{N}_2\text{O}_2]$ : 69.41 / 5.82 / 11.56, found: 69.14 / 5.82 / 11.52; mp: 107 °C.

### **5-Cyclohexyl-*N*-cyclopropylisoxazole-3-carboxamide (Ox-38)**

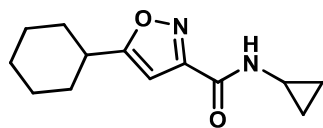

According to general procedure B, step B1 (method B), utilization of 1-cyclohexylethan-1-one (1893 mg, 15.00 mmol) afforded methyl (Z)-4-cyclohexyl-2-hydroxy-4-oxobut-2-enoate (1715 mg, 8.07 mmol) in 54 % yield. Reaction of this intermediate (1715 mg, 8.07 mmol) following general procedure B, step B2, gave rise to methyl 5-cyclohexylisoxazole-3-carboxylate (328 mg, 1.57mmol ) in 19 % yield:  $^1\text{H-NMR}$  (500 MHz,  $\text{DMSO-d}_6$ ):  $\delta_{\text{H}}$  = 6.65 (s, 1H), 3.88 (s, 3H), 2.89 (m, 1H), 2.00 – 1.20 (m, 10H);  $^{13}\text{C-NMR}$  (125 MHz,  $\text{DMSO-d}_6$ )  $\delta_{\text{C}}$  = 179.5, 160.0, 155.6, 100.1, 52.6, 35.4, 30.3, 25.1, 24.9; HRMS (ESI,  $m/z$ ):  $[\text{M}+\text{H}]^+$  calculated for  $[\text{C}_{11}\text{H}_{16}\text{NO}_3]$ : 210.1152, found: 210.1128; combustion analysis (C/H/N, %): calculated for  $[\text{C}_{11}\text{H}_{15}\text{NO}_3]$ : 63.14 / 7.23 / 6.69, found: 62.96 / 7.17 / 6.56; mp: 71 °C.

Reaction of the methyl ester (300 mg, 1.43 mmol, 1.00 eq.) with cyclopropylamine (164 mg, 2.87 mmol, 2.0 eq.) according to general procedure B, step B3, followed by column chromatography (cHex / EtOAc, 4:1) provided **Ox-38** (60 mg, 0.26 mmol) in 18 % yield as colorless crystals:  $^1\text{H-NMR}$  (500 MHz, DMSO- $\text{d}_6$ ):  $\delta_{\text{H}}$  = 8.68 (d,  $^3J_{\text{H,H}}$  = 4.3 Hz, 1H), 6.50 (s, 1H), 2.88 – 2.80 (m, 2H), 2.01 – 1.20 (m, 10H), 0.70 – 0.57 (m, 4H);  $^{13}\text{C-NMR}$  (125 MHz, DMSO- $\text{d}_6$ )  $\delta_{\text{C}}$  = 178.4, 159.9, 158.6, 98.9, 35.3, 30.5, 25.2, 24.9, 22.6, 5.5; HRMS (ESI,  $m/z$ ):  $[\text{M}+\text{Na}]^+$  calculated for  $[\text{C}_{13}\text{H}_{18}\text{N}_2\text{O}_2\text{Na}]$ : 257.1260; found: 257.1264; combustion analysis (C/H/N, %): calculated for  $[\text{C}_{13}\text{H}_{18}\text{N}_2\text{O}_2]$ : 66.64 / 7.74 / 11.96, found: 66.62 / 7.69 / 11.93; mp: 139 °C.

### Cited literature

- [1] J. Schneider, J. Hsieh, D. Frantz, S.L. Mcknight, J.M. Ready, U.S. (2012), US 8193225 B2
- [2] J. L. Russell, S. C. Goetsch, H. R. Aguilar, H. Coe, X. Luo, N. Liu, E. van Rooij, D. E. Frantz, J. W. Schneider, *ACS Chem. Biol.* **2012**, 7, 1077–1083.
- [3] M. Flipo, M. Desroses, N. Lecat-Guillet, B. Dirié, X. Carette, F. Leroux, C. Piveteau, F. Demirkaya, Z. Lens, P. Rucktooa, et al., *J. Med. Chem.* **2011**, 54, 2994–3010.
- [4] Y. T. Han, K. Kim, G.-I. Choi, H. An, D. Son, H. Kim, H.-J. Ha, J.-H. Son, S.-J. Chung, H.-J. Park, et al., *Eur. J. Med. Chem.* **2014**, 79, 128–142.

Table S1:

Hh reporter luciferase screen (8xGli3S-Luc) in MCF7:

|          | Compound                             | Concentration in assay | Description                                                         | mean RLU [%]<br>(normalized to total protein and rel. to DMSO) | SEM         |
|----------|--------------------------------------|------------------------|---------------------------------------------------------------------|----------------------------------------------------------------|-------------|
| HAT-Inh  | DMSO                                 | 0.5%                   | Solvent                                                             | 100                                                            | 0           |
|          | C646                                 | 10 µM                  | An inhibitor of the HAT p300                                        | 96,31690053                                                    | 11,8129211  |
|          | 3-amino Benzamide                    | 10 µM                  | Inhibitor of poly(ADP-ribose) polymerases                           | 81,42333017                                                    | 23,24565018 |
|          | CAY10669                             | 10 µM                  | An inhibitor of PCAF                                                | 76,00869723                                                    | 26,65092399 |
|          | Delephinidin<br>(chloride)           | 10 µM                  | Natural vasorelaxant and inhibitor of EGFRs and HATs                | 78,12342577                                                    | 22,19011266 |
|          | CPTH2<br>(hydrochloride)             | 10 µM                  | A HAT inhibitor                                                     | 111,3996295                                                    | 36,72324155 |
|          | Anacardic Acid                       | 10 µM                  | A histone acetyltransferase inhibitor                               | 114,9807391                                                    | 24,6367256  |
|          | I-CBP112<br>(hydrochloride)          | 10 µM                  | A selective inhibitor of CBP and EP300                              | 131,3945123                                                    | 36,81326003 |
| SIRT-Inh | Sirtinol                             | 10 µM                  | Inhibitor of sirtuin deacetylases                                   | 114,0608629                                                    | 43,95775591 |
|          | JGB1741                              | 10 µM                  | A SIRT1 inhibitor                                                   | 95,29954353                                                    | 38,07229752 |
|          | AGK2                                 | 10 µM                  | Inhibitor of SIRT2                                                  | 62,658506                                                      | 12,01734789 |
|          | Sidermide                            | 10 µM                  | A sirtuin inhibitor                                                 | 130,338155                                                     | 36,62744695 |
|          | SIRT1/2 inhibitor IV                 | 10 µM                  | Cell-permeable inhibitor of SIRT1 and SIRT2                         | 124,2546724                                                    | 22,33046412 |
|          | CAY10591                             | 10 µM                  | A SIRT1 activator                                                   | 88,19312997                                                    | 18,42930001 |
|          | (S)-EX-527                           | 10 µM                  | A SIRT1 inhibitor                                                   | 113,3551543                                                    | 27,70540382 |
|          | Nicotinamide                         | 10 µM                  | An amide form of vitamin B3 (niacin)                                | 91,50706153                                                    | 6,984817422 |
| PAD-Inh  | Cl-Amidine<br>(hydrochloride)        | 10 µM                  | A PAD inhibitor                                                     | 139,4459063                                                    | 14,48005493 |
|          | F-Amidine<br>(trifluoroacetate salt) | 10 µM                  | A PAD inhibitor                                                     | 105,8232819                                                    | 21,95641831 |
| HDAC-Inh | CAY10398                             | 10 µM                  | A potent, cost-effective histone deacetylase inhibitor              | 152,3711743                                                    | 70,77881585 |
|          | Trichostatin A                       | 10 µM                  | A potent, reversible inhibitor of histone deacetylases              | 92,91662037                                                    | 38,23185572 |
|          | Splitomicin                          | 10 µM                  | Inhibitor of yeast Sir2p                                            | 91,52741293                                                    | 8,00740162  |
|          | Chidamide                            | 10 µM                  | An HDAC inhibitor                                                   | 311,5718675                                                    | 62,3104075  |
|          | Pyroxamide                           | 10 µM                  | A HDAC inhibitor                                                    | 108,7175481                                                    | 32,68024592 |
|          | SAHA                                 | 10 µM                  | An HDAC inhibitor                                                   | 130,185456                                                     | 43,43315565 |
|          | RD 5179                              | 10 µM                  | An inhibitor of class I and II HDACs                                | 241,3853537                                                    | 64,74552215 |
|          | BML-210                              | 10 µM                  | A potent, synthetic HDAC inhibitor                                  | 166,18725597                                                   | 26,91335596 |
|          | ACY-1215                             | 10 µM                  | HDAC6 inh                                                           | 146,3189209                                                    | 31,13893917 |
|          | SB939                                | 10 µM                  | A pan-HDAC inhibitor                                                | 82,3576149                                                     | 20,58908315 |
|          | PCI 34051                            | 10 µM                  | A potent, selective HDAC8 inhibitor                                 | 189,7479261                                                    | 63,66145656 |
|          | 4-iodo-SAHA                          | 10 µM                  | A potent SAHA analog                                                | 220,3846463                                                    | 65,83006693 |
|          | Scriptaid                            | 10 µM                  | HDAC inhibitor                                                      | 266,6133442                                                    | 182,2241748 |
|          | Suberoyldioxamic Acid                | 10 µM                  | HDAC inhibitor                                                      | 80,38619547                                                    | 19,51987767 |
|          | Apicidin                             | 10 µM                  | A cell-permeable HDAC inhibitor                                     | 44,2445875                                                     | 8,092029925 |
|          | ITF 2357                             | 10 µM                  | HDAC inhibitor with anti-inflammatory and antineoplastic activities | 85,5265122                                                     | 55,86186546 |
|          | Valproic Acid<br>(sodium salt)       | 10 µM                  | An analog of valeric acid                                           | 103,6173897                                                    | 44,19445851 |
|          | Sodium Butyrate                      | 10 µM                  | A short-chain fatty acid and HDAC inhibitor                         | 123,2765742                                                    | 41,40049694 |
|          | CAY10603                             | 10 µM                  | An exceptionally potent inhibitor of HDAC6                          | 130,8464154                                                    | 29,89002245 |
|          | CBHA                                 | 10 µM                  | Inhibitor of histone deacetylases                                   | 200,393551                                                     | 60,19494243 |
|          | M 344                                | 10 µM                  | HDAC inhibitor                                                      | 230,6836607                                                    | 79,56793923 |
|          | Oxamflatin                           | 10 µM                  | Inhibitor of histone deacetylases                                   | 184,573451                                                     | 72,17046632 |
|          | Pimelic Diphenylamide 106            | 10 µM                  | A tight-binding inhibitor of class I HDACs                          | 285,000631                                                     | 15,00896    |
|          | (S)-HDAC-42                          | 10 µM                  | Inhibitor of HDACs                                                  | 126,6023896                                                    | 61,39795726 |
|          | MS-275                               | 10 µM                  | A histone deacetylase inhibitor                                     | 280,489598                                                     | 117,765188  |
|          | HNHA                                 | 10 µM                  | HDAC inhibitor                                                      | 97,13139027                                                    | 8,192142564 |
| HMT-Inh  | UNC0321<br>(trifluoroacetate salt)   | 10 µM                  | A highly potent inhibitor of G9a histone methyltransferase          | 85,030968                                                      | 39,62653339 |
|          | UNC0638                              | 10 µM                  | A G9a and GLP histone methyltransferase inhibitor                   | 113,9436464                                                    | 36,20878987 |
|          | Zebularine                           | 10 µM                  | A DNA methyltransferase inhibitor                                   | 75,69334617                                                    | 23,15015999 |
|          | (-)-Neplanocin A                     | 10 µM                  | Irreversible SAH hydrolase inhibitor                                | 142,1967218                                                    | 43,80896699 |
|          | 5-Azacytidine                        | 10 µM                  | A DNA methyltransferase inhibitor                                   | 116,9117598                                                    | 55,05301799 |
|          | MI-2<br>(hydrochloride)              | 10 µM                  | An inhibitor of menin-MLL interactions                              | 187,5501167                                                    | 101,9586034 |
|          | MI-nc<br>(hydrochloride)             | 10 µM                  | A negative control for MI-2                                         | 133,8774903                                                    | 19,0638454  |
|          | Chaetocin                            | 10 µM                  | Inhibitor of lys9-specific HMTs                                     | 28,5188832                                                     | 20,33329324 |
|          | WDR5-0103                            | 10 µM                  | An inhibitor of WDR5 peptide binding                                | 77,01088387                                                    | 14,84731178 |
|          | UNC0224                              | 10 µM                  | A potent inhibitor of G9a histone methyltransferase                 | 184,9552968                                                    | 45,5349343  |
|          | S-Adenosylhomocysteine               | 10 µM                  | Amino Acid Derivative                                               | 165,7071664                                                    | 46,54281155 |
|          | BK01294<br>(hydrochloride hydrate)   | 10 µM                  | An inhibitor of G9a histone methyltransferase                       | 53,0042893                                                     | 18,35956451 |
| BET-Inh  | PFI-1                                | 10 µM                  | A BET bromodomain inhibitor                                         | 84,8992166                                                     | 28,64033514 |
|          | (+)-JQ1                              | 10 µM                  | A selective inhibitor of BET bromodomains                           | 31,09761635                                                    | 1,49725865  |
|          | (-)-JQ1                              | 10 µM                  | The inactive stereoisomer of a BET bromodomain inhibitor            | 153,7976189                                                    | 58,78773208 |
|          | PFI-3                                | 10 µM                  | Probe for bromodomains of SMARCA2/4 and P81(bromodomain 5)          | 121,694926                                                     | 13,6298604  |
| DNMT-Inh | Decitabine                           | 10 µM                  | A 2' deoxy analog of 5-azacytidine                                  | 163,6473651                                                    | 96,10772273 |
|          | Gemcitabine                          | 10 µM                  | An anticancer nucleoside analog; DNA-MT-Inhib.                      | 80,72765833                                                    | 24,94488602 |
|          | Lomeguatrib                          | 10 µM                  | Inactivator of O6-methylguanine-DNA methyltransferase               | 142,2533415                                                    | 56,26816868 |
|          | RG-108                               | 10 µM                  | DNA methyltransferase liguanitor                                    | 93,21509277                                                    | 7,506607186 |
|          | 2',3',5'-triacetyl-5-Azacytidine     | 10 µM                  | A prodrug form of 5-azacytidine                                     | 119,2624627                                                    | 21,94341168 |
|          | Sinefungin                           | 10 µM                  | A methyltransferase inhibitor                                       | 127,3761643                                                    | 27,82762212 |
| HDM-Inh  | IOX1                                 | 10 µM                  | A 2-oxoglutarate oxygenase inhibitor                                | 70,62149707                                                    | 19,44142348 |
|          | Octyl-α-ketoglutarate                | 10 µM                  | A cell-permeable form of α-ketoglutarate                            | 158,7908981                                                    | 79,32505703 |
|          | Daminozide                           | 10 µM                  | Selective inhibitor of KDM2/7 histone demethylases                  | 91,1544438                                                     | 22,22891709 |
|          | GSK-J1<br>(sodium salt)              | 10 µM                  | A dual inhibitor of JMJD3 and UTX                                   | 206,7227938                                                    | 121,2236308 |
|          | GSK-J2<br>(sodium salt)              | 10 µM                  | A negative control compound for GSK-J1                              | 117,3448177                                                    | 58,0016317  |
|          | GSK-J4<br>(hydrochloride)            | 10 µM                  | Prodrug of a selective H3K27 histone demethylase inhibitor          | 54,83999017                                                    | 8,046000051 |
|          | GSK-J5<br>(hydrochloride)            | 10 µM                  | A negative control compound for GSK-J4                              | 78,71332593                                                    | 25,65397294 |
|          | 3-Deazaneplanocin A                  | 10 µM                  | An inhibitor of lysine methyltransferase EZH2                       | 198,4617523                                                    | 46,32249397 |
|          | GSK343                               | 10 µM                  | A selective, cell-permeable EZH2 inhibitor                          | 171,5361917                                                    | 29,94173021 |
|          | UNC1999                              | 10 µM                  | A selective, cell-permeable EZH2 inhibitor                          | 121,4363806                                                    | 22,78631728 |
|          | JIB04                                | 10 µM                  | Jumonji-Inh                                                         | 138,885139                                                     | 11,38483711 |
|          | Tranylcypromine<br>(hydrochloride)   | 10 µM                  | An irreversible, mechanism-based inhibitor of LSD1                  | 87,03578493                                                    | 1,80770441  |
|          | N-Oxalylglycine                      | 10 µM                  | An inhibitor of JMJD2 histone demethylases                          | 130,0935957                                                    | 50,59828383 |
| Other    | Ellagic Acid                         | 10 µM                  | Polyphenolic antioxidant, DNA-Topoisoмераse-Inh                     | 116,8468078                                                    | 30,6209454  |
|          | Phthalazinone pyrazole               | 10 µM                  | Potent, selective inhibitor of Aurora kinase A                      | 90,5956887                                                     | 30,36985365 |
|          | CCG-106002                           | 10 µM                  | A Rho/MKL1 transcriptional pathway inhibitor                        | 131,9870906                                                    | 40,81779615 |
|          | Isoliquiritigenin                    | 10 µM                  | A flavonoid with diverse biological activities                      | 223,5112213                                                    | 136,7402244 |
|          | BSI-201                              | 10 µM                  | A PARP1 inhibitor                                                   | 133,7598507                                                    | 80,81793712 |
|          | 1-Naphthoic Acid                     | 10 µM                  | A synthetic intermediate                                            | 62,12763017                                                    | 40,79193638 |
|          | Sodium 4-Phenylbutyrate              | 10 µM                  | A chemical chaperone                                                | 57,06994597                                                    | 12,69327374 |
|          | Tenovin-1                            | 10 µM                  | A small molecule activator of p53                                   | 86,64301937                                                    | 16,38219028 |
|          | Tenovin-6                            | 10 µM                  | A small molecule activator of p53                                   | 47,53935297                                                    | 15,76489771 |
|          | Nutlin3                              | 10 µM                  | A small molecule activator of p53, p53/MDM2-inh.                    | 111,0214641                                                    | 42,95990128 |
|          | SAG                                  | 100 nM                 | SMO agonist                                                         | 125,5487825                                                    | 5,7361305   |
|          | Quercetin                            | 2 mM                   | pleiotropic Flavonoid                                               | 171,0033617                                                    | 81,29308191 |
|          | PFL 64728                            | 10 µM                  | Activator of Calcium Channels                                       | 202,9814877                                                    | 81,29288709 |
|          | PF-573228                            | 10 µM                  | FAK-Inh                                                             | 75,6167107                                                     | 10,53614627 |
|          | AY9844                               | 10 µM                  | DHCR7-Inh (Cholesterol Biosynthesis)                                | 89,55044277                                                    | 15,45028525 |
|          | Kenpaulone                           | 10 µM                  | CDK-Inh                                                             | 64,6525251                                                     | 28,59356294 |
|          | Parvaland A                          | 10 µM                  | CDK-Inh                                                             | 93,09543877                                                    | 8,375583431 |
|          | ISX                                  | 10 µM                  | unknown                                                             | 878,5463333                                                    | 88,4873115  |
|          | Mirin                                | 10 µM                  | Inhibitor of the DNA damage sensor MRN                              | 111,5183636                                                    | 33,71259831 |
|          | AMI-1<br>(sodium salt)               | 10 µM                  | A cell permeable inhibitor of PRMTs                                 | 90,44831567                                                    | 18,30448535 |
|          | UNC1215                              | 10 µM                  | Potent L3MBTL3 domain inhibitor                                     | 93,7972943                                                     | 21,13068158 |

|                          |       |                                                                      |             |             |
|--------------------------|-------|----------------------------------------------------------------------|-------------|-------------|
| trans-Resveratrol        | 10 µM | A polyphenolic phytoalexin                                           | 211,611419  | 46,87983152 |
| 2,4-DPD                  | 10 µM | A cell permeable, competitive inhibitor of HIF-PH                    | 69,33914923 | 3,606864203 |
| DMOG                     | 10 µM | HIF-1α prolyl hydroxylase inhibitor                                  | 80,0091028  | 17,14436966 |
| Piceatannol              | 10 µM | A potent resveratrol analog                                          | 218,3660953 | 56,33310183 |
| SB203580                 | 10 µM | p38-MAPK14 Inh                                                       | 143,9894313 | 24,86053685 |
| Nifedipine               | 10 µM | Calcium Antagonist                                                   | 128,5830047 | 8,043541536 |
| BAPTA                    | 10 µM | Calcium Chelator                                                     | 177,750381  | 38,74036959 |
| RSC-133                  | 10 µM | Induces pluripotency in somatic cells                                | 105,5669004 | 52,77707414 |
| KN93                     | 10 µM | CaMK-Inh                                                             | 104,995363  | 5,070804238 |
| MK801                    | 10 µM | NMDAR-Antagonist                                                     | 194,8718307 | 74,28277805 |
| Bortezomib               | 1 µM  | Proteasome Inh                                                       | 29,34833413 | 4,032231046 |
| Suramin<br>(sodium salt) | 10 µM | An anticancer and antiviral agent with multiple mechanisms of action | 164,3864595 | 53,90292388 |
